# Supplementary material
Source: MDPI journal article supplement (https://www.mdpi.com/1424-2818/18/1/50)
Supplement: s1 [file diversity-4039544-supplementary.pdf › diversity-4039544-supplementary/diversity-4039544-supplementary.pdf]

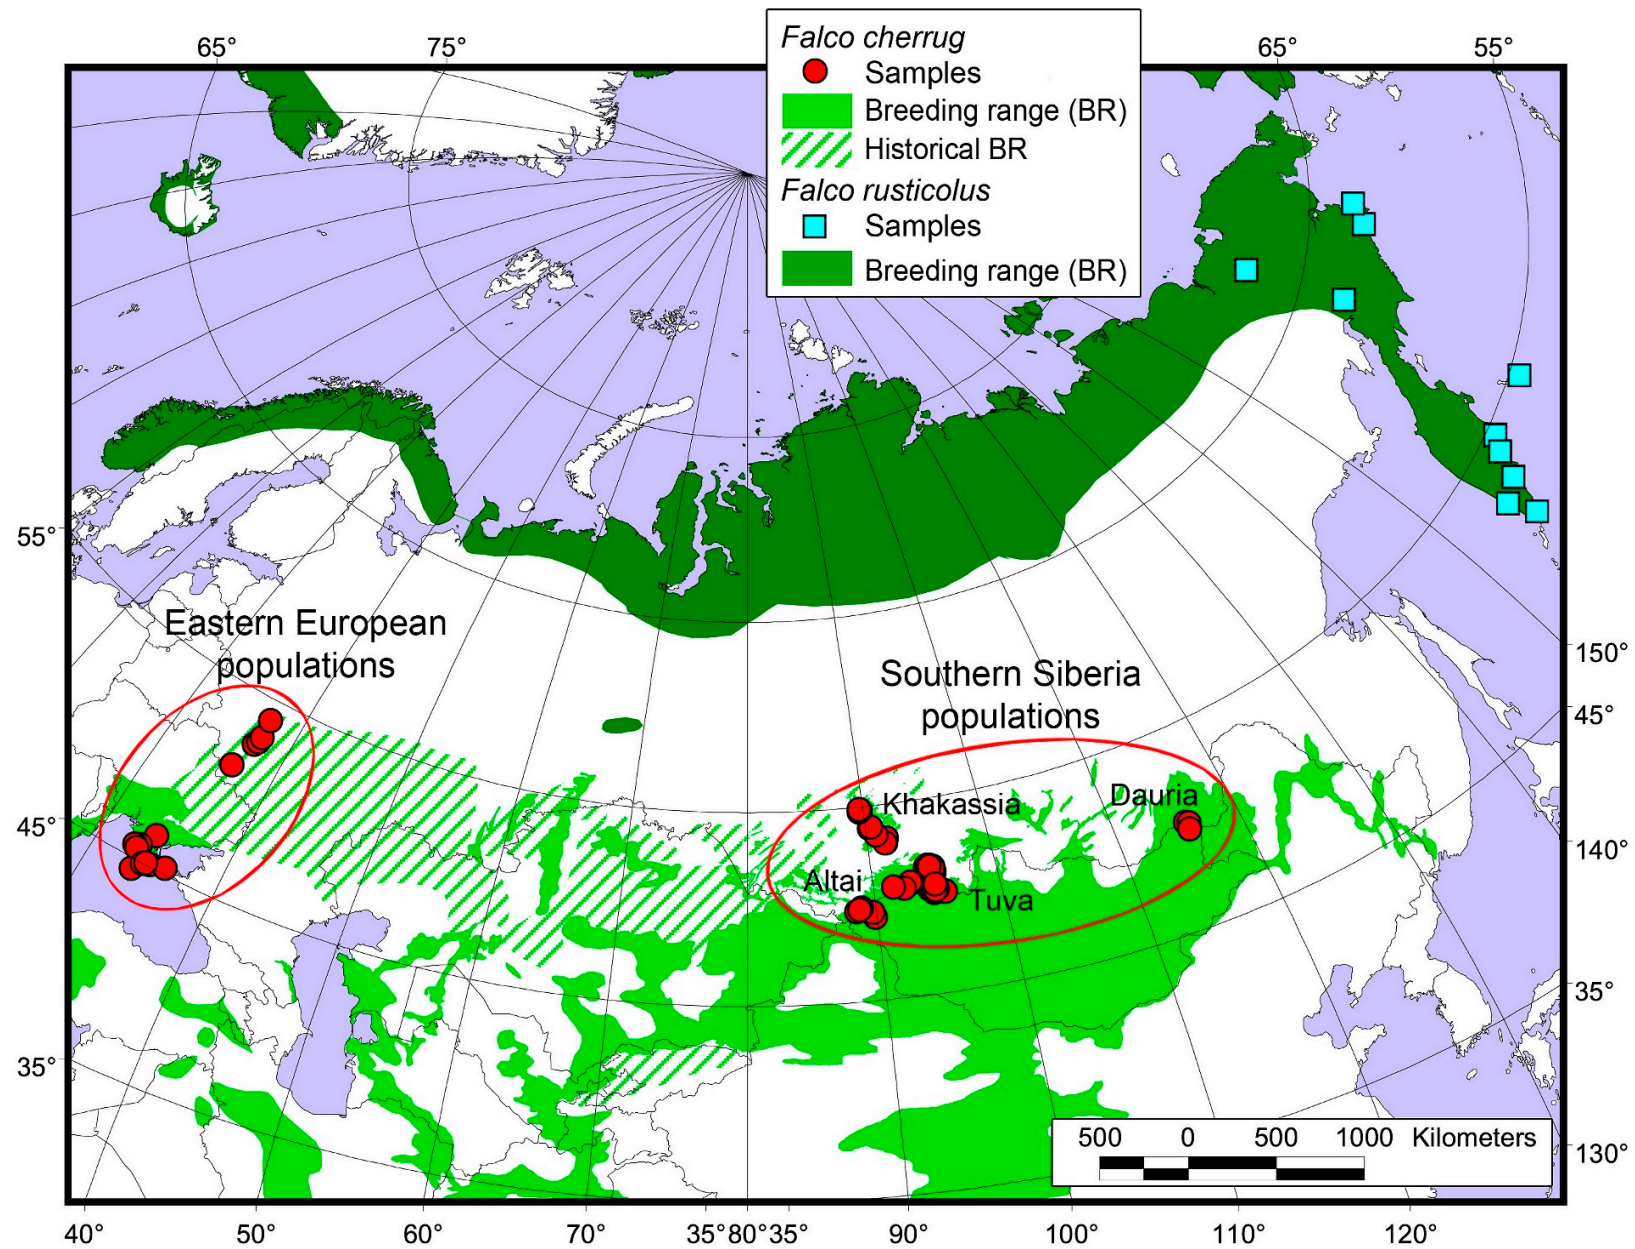

Supplementary Figure S1. Sampling localities. Map created using ArcGIS 9 (ESRI).

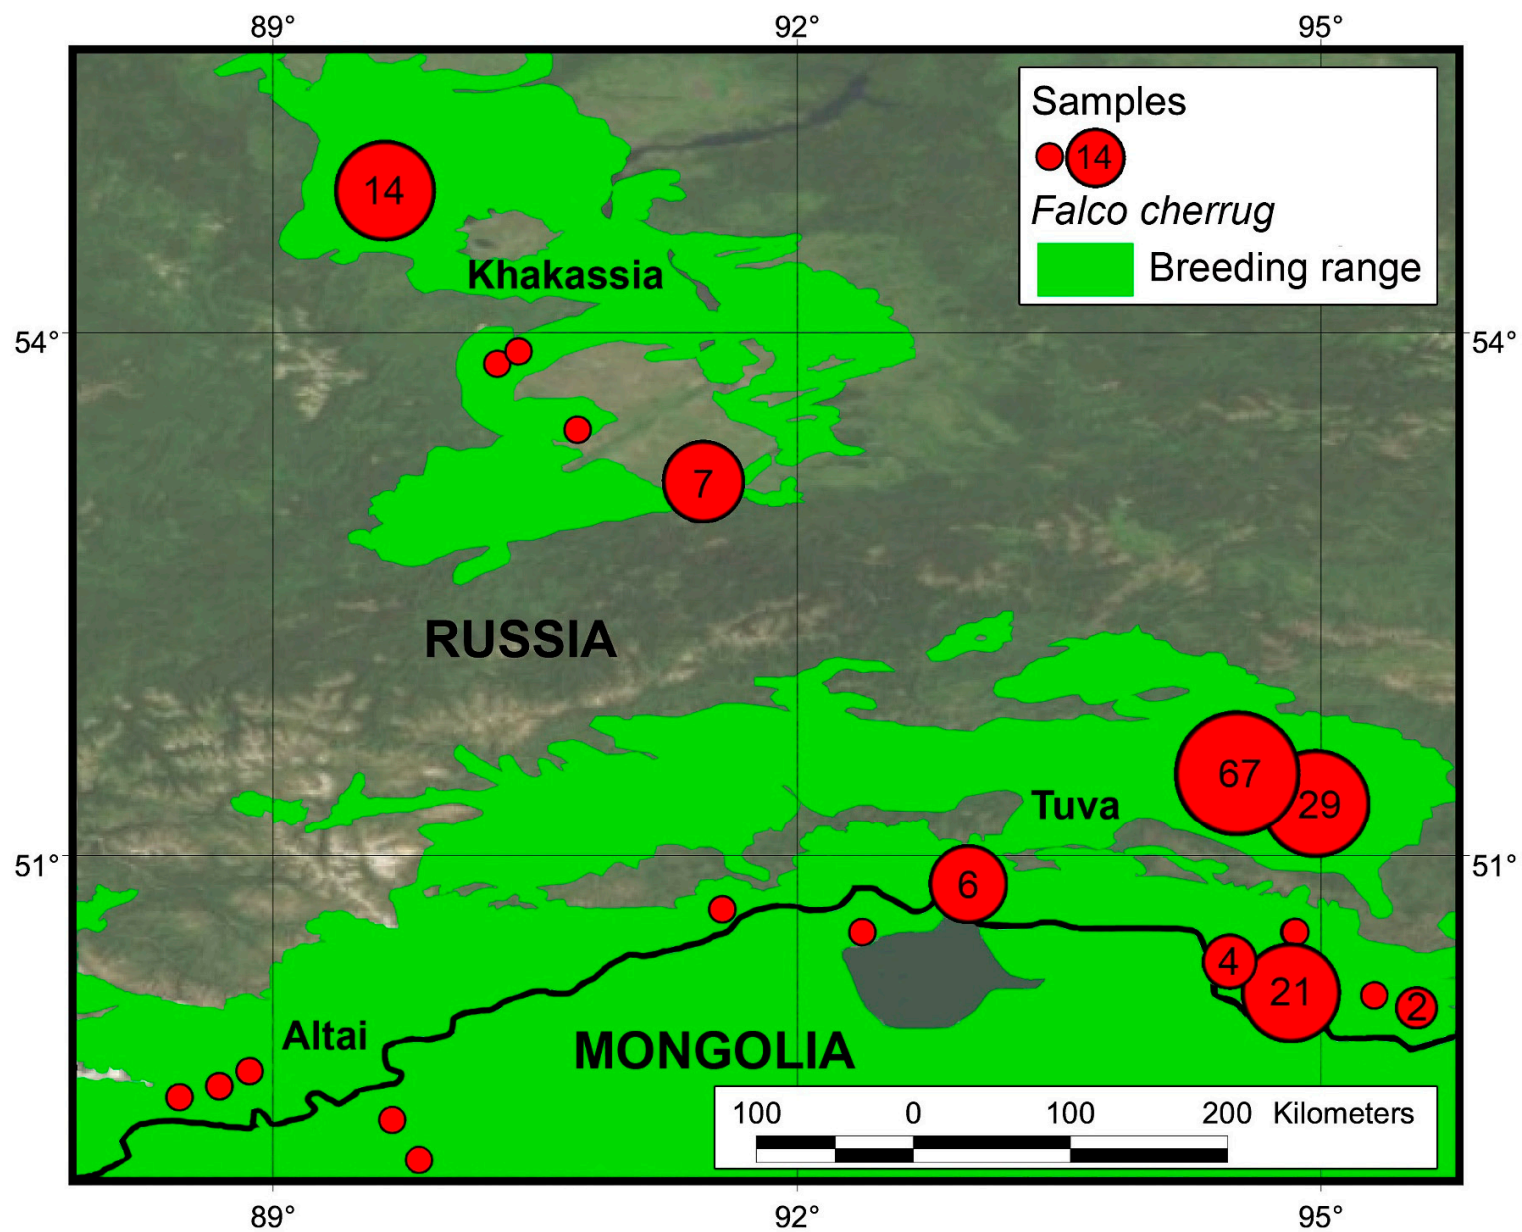

**Supplementary Figure S2.** Sampling localities of saker falcons from southern Siberia. Map created using ArcGIS 9 (ESRI).

**Supplementary Table S1.** Sample details. Samples used for mitochondrial DNA analyses are indicated in bold. MS: skin from museum specimen; MF: molted feather; GF: preserved growing feather; ACF: alcohol-preserved contour feather; CF: dry contour feather; ZM: Zoological Museum of Moscow University; SEC: LLC “Siberian Ecological Centre”; ARIE: All-Russian Research Institute “Ecology”.

| №  | Sample IDs<br>(type of material_ ID_year_locality) | Species           | Population     | Collection | Collector                     | GenBank<br>accession<br>numbers   |
|----|----------------------------------------------------|-------------------|----------------|------------|-------------------------------|-----------------------------------|
| 1  | MS_MO2_R-21649_1910_Crimea                         | <i>F. cherrug</i> | Eastern Europe | ZM         | Rozhkova D.N., Zinevich L.S.  |                                   |
| 2  | MS_MO10_R-21650_1916_Crimea                        | <i>F. cherrug</i> | Eastern Europe | ZM         | Rozhkova D.N., Zinevich L.S.  |                                   |
| 3  | <b>MF_Baloban-PRIS_2015_Crimea</b>                 | <i>F. cherrug</i> | Eastern Europe | SEC        | Karyakin I.V. with colleagues | PX511672<br>MT431193 <sup>1</sup> |
| 4  | <b>MF_FC23_2015_Crimea</b>                         | <i>F. cherrug</i> | Eastern Europe | SEC        | Karyakin I.V. with colleagues | PX511668<br>MT431195 <sup>1</sup> |
| 5  | <b>MF_FC25_2015_Crimea</b>                         | <i>F. cherrug</i> | Eastern Europe | SEC        | Karyakin I.V. with colleagues | PX511669<br>MT431194 <sup>1</sup> |
| 6  | <b>MF_FC38_2015_Crimea</b>                         | <i>F. cherrug</i> | Eastern Europe | SEC        | Karyakin I.V. with colleagues | PX511670<br>MT431196 <sup>1</sup> |
| 7  | <b>MF_FC41_2015_Crimea</b>                         | <i>F. cherrug</i> | Eastern Europe | SEC        | Karyakin I.V. with colleagues | PX511671                          |
| 8  | <b>MF_SFC09_2019_Crimea</b>                        | <i>F. cherrug</i> | Eastern Europe | ARIE       | Prokopenko S.P., Sorokin A.G. | PX511647<br>MT431208 <sup>1</sup> |
| 9  | <b>MF_ZFC10_2019_Crimea</b>                        | <i>F. cherrug</i> | Eastern Europe | ARIE       | Prokopenko S.P., Sorokin A.G. | PX511648<br>MT431207 <sup>1</sup> |
| 10 | MS_MO11_R-7214_1921_Tula                           | <i>F. cherrug</i> | Eastern Europe | ZM         | Rozhkova D.N., Zinevich L.S.  |                                   |
| 11 | MS_MO12_R-7211_1927_Tula                           | <i>F. cherrug</i> | Eastern Europe | ZM         | Rozhkova D.N., Zinevich L.S.  |                                   |
| 12 | MS_MO13_R-33539_1922_Tula                          | <i>F. cherrug</i> | Eastern Europe | ZM         | Rozhkova D.N., Zinevich L.S.  |                                   |
| 13 | MS_MO14_R-7215_1923_Tula                           | <i>F. cherrug</i> | Eastern Europe | ZM         | Rozhkova D.N., Zinevich L.S.  |                                   |
| 14 | MS_MO17_R-33538_1922_Tula                          | <i>F. cherrug</i> | Eastern Europe | ZM         | Rozhkova D.N., Zinevich L.S.  |                                   |
| 15 | MS_MO20_R-96895_1938_Tula                          | <i>F. cherrug</i> | Eastern Europe | ZM         | Rozhkova D.N., Zinevich L.S.  |                                   |
| 16 | MS_MO24_R-24543_1927_Kursk                         | <i>F. cherrug</i> | Eastern Europe | ZM         | Rozhkova D.N., Zinevich L.S.  |                                   |

|    |                              |                   |                |     |                               |          |
|----|------------------------------|-------------------|----------------|-----|-------------------------------|----------|
| 17 | MS_MO25_R-24544_1927_Kursk   | <i>F. cherrug</i> | Eastern Europe | ZM  | Rozhkova D.N., Zinevich L.S.  |          |
| 18 | MS_MO35_R-97697_1966_Khak    | <i>F. cherrug</i> | Khakassia      | ZM  | Rozhkova D.N., Zinevich L.S.  |          |
| 19 | MS_MO36_R-97701_1968_Khak    | <i>F. cherrug</i> | Khakassia      | ZM  | Rozhkova D.N., Zinevich L.S.  |          |
| 20 | MS_MO38_R-97700_1968_Khak    | <i>F. cherrug</i> | Khakassia      | ZM  | Rozhkova D.N., Zinevich L.S.  |          |
| 21 | MS_MO39_R-97703_1968_Khak    | <i>F. cherrug</i> | Khakassia      | ZM  | Rozhkova D.N., Zinevich L.S.  |          |
| 22 | MS_MO40_R-97699_1968_Khak    | <i>F. cherrug</i> | Khakassia      | ZM  | Rozhkova D.N., Zinevich L.S.  |          |
| 23 | MS_MO41_R-97702_1968_Khak    | <i>F. cherrug</i> | Khakassia      | ZM  | Rozhkova D.N., Zinevich L.S.  |          |
| 24 | MS_MO42_R-97698_1968_Khak    | <i>F. cherrug</i> | Khakassia      | ZM  | Rozhkova D.N., Zinevich L.S.  |          |
| 25 | MF_FC1_FC-RH35-1_2014_Khak   | <i>F. cherrug</i> | Khakassia      | SEC | Karyakin I.V. with colleagues |          |
| 26 | MF_AH-09_FC-RH30-1_2014_Khak | <i>F. cherrug</i> | Khakassia      | SEC | Karyakin I.V. with colleagues |          |
| 27 | <b>GF_D347_25_2016_Khak</b>  | <i>F. cherrug</i> | Khakassia      | SEC | Karyakin I.V. with colleagues | PX511674 |
| 28 | <b>GF_D308_20_2016_Khak</b>  | <i>F. cherrug</i> | Khakassia      | SEC | Karyakin I.V. with colleagues | PX511673 |
| 29 | GF_D400_2020_Khak            | <i>F. cherrug</i> | Khakassia      | SEC | Karyakin I.V. with colleagues |          |
| 30 | GF_probe 17_2016_Khak        | <i>F. cherrug</i> | Khakassia      | SEC | Karyakin I.V. with colleagues |          |
| 31 | GF_D310_23_2016_Khak         | <i>F. cherrug</i> | Khakassia      | SEC | Karyakin I.V. with colleagues |          |
| 32 | <b>GF_D350_7_2016_Khak</b>   | <i>F. cherrug</i> | Khakassia      | SEC | Karyakin I.V. with colleagues | PX511675 |
| 33 | GF_N1_FC75_2021_Khak         | <i>F. cherrug</i> | Khakassia      | SEC | Karyakin I.V. with colleagues |          |
| 34 | GF_N2_FC76_2021_Khak         | <i>F. cherrug</i> | Khakassia      | SEC | Karyakin I.V. with colleagues |          |
| 35 | GF_CA30_FC77_2021_Khak       | <i>F. cherrug</i> | Khakassia      | SEC | Karyakin I.V. with colleagues |          |
| 36 | GF_CA31_FC78_2021_Khak       | <i>F. cherrug</i> | Khakassia      | SEC | Karyakin I.V. with colleagues |          |
| 37 | GF_CA32_FC79_2021_Khak       | <i>F. cherrug</i> | Khakassia      | SEC | Karyakin I.V. with colleagues |          |

|    |                              |                   |           |     |                               |                                   |
|----|------------------------------|-------------------|-----------|-----|-------------------------------|-----------------------------------|
| 38 | GF_CA33_FC80_2021_Khak       | <i>F. cherrug</i> | Khakassia | SEC | Karyakin I.V. with colleagues |                                   |
| 39 | GF_CA34_FC81_2021_Khak       | <i>F. cherrug</i> | Khakassia | SEC | Karyakin I.V. with colleagues |                                   |
| 40 | GF_D459_FC82_2021_Khak       | <i>F. cherrug</i> | Khakassia | SEC | Karyakin I.V. with colleagues |                                   |
| 41 | GF_D460_FC83_2021_Khak       | <i>F. cherrug</i> | Khakassia | SEC | Karyakin I.V. with colleagues |                                   |
| 42 | GF_CA26_FC84_2021_Khak       | <i>F. cherrug</i> | Khakassia | SEC | Karyakin I.V. with colleagues |                                   |
| 43 | <b>ACF_O-P057_2017_Tuva</b>  | <i>F. cherrug</i> | Tuva      | SEC | Karyakin I.V. with colleagues | PX511676                          |
| 44 | <b>GF_D002_40B_2018_Tuva</b> | <i>F. cherrug</i> | Tuva      | SEC | Karyakin I.V. with colleagues | PX511678                          |
| 45 | GF_D416_2017_Tuva            | <i>F. cherrug</i> | Tuva      | SEC | Karyakin I.V. with colleagues |                                   |
| 46 | GF_D417_2017_Tuva            | <i>F. cherrug</i> | Tuva      | SEC | Karyakin I.V. with colleagues |                                   |
| 47 | GF_D418_2017_Tuva            | <i>F. cherrug</i> | Tuva      | SEC | Karyakin I.V. with colleagues |                                   |
| 48 | <b>GF_D450_2017_Tuva</b>     | <i>F. cherrug</i> | Tuva      | SEC | Karyakin I.V. with colleagues | PX511687                          |
| 49 | GF_D468_FC85_2021_Tuva       | <i>F. cherrug</i> | Tuva      | SEC | Karyakin I.V. with colleagues |                                   |
| 50 | GF_D469_FC86_2021_Tuva       | <i>F. cherrug</i> | Tuva      | SEC | Karyakin I.V. with colleagues |                                   |
| 51 | GF_D470_FC87_2021_Tuva       | <i>F. cherrug</i> | Tuva      | SEC | Karyakin I.V. with colleagues |                                   |
| 52 | GF_D438_FC56_2021_Tuva       | <i>F. cherrug</i> | Tuva      | SEC | Karyakin I.V. with colleagues |                                   |
| 53 | GF_D439_FC57_2021_Tuva       | <i>F. cherrug</i> | Tuva      | SEC | Karyakin I.V. with colleagues |                                   |
| 54 | GF_D196_61B_2018_Tuva        | <i>F. cherrug</i> | Tuva      | SEC | Karyakin I.V. with colleagues |                                   |
| 55 | <b>GF_C883_62B_2018_Tuva</b> | <i>F. cherrug</i> | Tuva      | SEC | Karyakin I.V. with colleagues | PX511655<br>OM937752 <sup>2</sup> |
| 56 | GF_D020_18B_2018_Tuva        | <i>F. cherrug</i> | Tuva      | SEC | Karyakin I.V. with colleagues |                                   |
| 57 | <b>GF_D023_21B_2018_Tuva</b> | <i>F. cherrug</i> | Tuva      | SEC | Karyakin I.V. with colleagues | PX511652<br>MT431204 <sup>1</sup> |

|    |                        |                   |      |     |                               |
|----|------------------------|-------------------|------|-----|-------------------------------|
| 58 | GF_D433_FC51_2021_Tuva | <i>F. cherrug</i> | Tuva | SEC | Karyakin I.V. with colleagues |
| 59 | GF_D434_FC52_2021_Tuva | <i>F. cherrug</i> | Tuva | SEC | Karyakin I.V. with colleagues |
| 60 | GF_D435_FC53_2021_Tuva | <i>F. cherrug</i> | Tuva | SEC | Karyakin I.V. with colleagues |
| 61 | GF_D430_FC50_2021_Tuva | <i>F. cherrug</i> | Tuva | SEC | Karyakin I.V. with colleagues |
| 62 | GF_D436_FC54_2021_Tuva | <i>F. cherrug</i> | Tuva | SEC | Karyakin I.V. with colleagues |
| 63 | GF_D397_FC60_2021_Tuva | <i>F. cherrug</i> | Tuva | SEC | Karyakin I.V. with colleagues |
| 64 | GF_D396_FC59_2021_Tuva | <i>F. cherrug</i> | Tuva | SEC | Karyakin I.V. with colleagues |
| 65 | GF_D398_FC61_2021_Tuva | <i>F. cherrug</i> | Tuva | SEC | Karyakin I.V. with colleagues |
| 66 | GF_CA70_FC62_2021_Tuva | <i>F. cherrug</i> | Tuva | SEC | Karyakin I.V. with colleagues |
| 67 | GF_D429_FC21-10_Tuva   | <i>F. cherrug</i> | Tuva | SEC | Karyakin I.V. with colleagues |
| 68 | GF_D428_FC21-9_Tuva    | <i>F. cherrug</i> | Tuva | SEC | Karyakin I.V. with colleagues |
| 69 | GF_D222_FC21-12_Tuva   | <i>F. cherrug</i> | Tuva | SEC | Karyakin I.V. with colleagues |
| 70 | GF_D223_FC21-13_Tuva   | <i>F. cherrug</i> | Tuva | SEC | Karyakin I.V. with colleagues |
| 71 | GF_D227_FC21-14_Tuva   | <i>F. cherrug</i> | Tuva | SEC | Karyakin I.V. with colleagues |
| 72 | GF_CA22_FC21-11_Tuva   | <i>F. cherrug</i> | Tuva | SEC | Karyakin I.V. with colleagues |
| 73 | GF_CA69_FC47_2021_Tuva | <i>F. cherrug</i> | Tuva | SEC | Karyakin I.V. with colleagues |
| 74 | GF_D394_FC48_2021_Tuva | <i>F. cherrug</i> | Tuva | SEC | Karyakin I.V. with colleagues |
| 75 | GF_D395_FC49_2021_Tuva | <i>F. cherrug</i> | Tuva | SEC | Karyakin I.V. with colleagues |
| 76 | GF_D420_FC21-5_Tuva    | <i>F. cherrug</i> | Tuva | SEC | Karyakin I.V. with colleagues |
| 77 | GF_D421_FC21-6_Tuva    | <i>F. cherrug</i> | Tuva | SEC | Karyakin I.V. with colleagues |

|    |                              |                   |      |     |                               |                                                            |
|----|------------------------------|-------------------|------|-----|-------------------------------|------------------------------------------------------------|
| 78 | GF_D427_FC21-7_Tuva          | <i>F. cherrug</i> | Tuva | SEC | Karyakin I.V. with colleagues |                                                            |
| 79 | GF_D426_FC21-8_Tuva          | <i>F. cherrug</i> | Tuva | SEC | Karyakin I.V. with colleagues |                                                            |
| 80 | GF_D480_FC65_2021_Tuva       | <i>F. cherrug</i> | Tuva | SEC | Karyakin I.V. with colleagues |                                                            |
| 81 | GF_D481_FC66_2021_Tuva       | <i>F. cherrug</i> | Tuva | SEC | Karyakin I.V. with colleagues |                                                            |
| 82 | GF_D040_36B_2018_Tuva        | <i>F. cherrug</i> | Tuva | SEC | Karyakin I.V. with colleagues |                                                            |
| 83 | GF_D041_39B_2018_Tuva        | <i>F. cherrug</i> | Tuva | SEC | Karyakin I.V. with colleagues |                                                            |
| 84 | <b>GF_D042_37B_2018_Tuva</b> | <i>F. cherrug</i> | Tuva | SEC | Karyakin I.V. with colleagues | PX511683                                                   |
| 85 | <b>GF_D035_27B_2018_Tuva</b> | <i>F. cherrug</i> | Tuva | SEC | Karyakin I.V. with colleagues | PX511682                                                   |
| 86 | GF_D210_FC38_2021_Tuva       | <i>F. cherrug</i> | Tuva | SEC | Karyakin I.V. with colleagues |                                                            |
| 87 | GF_CA65_FC37_2021_Tuva       | <i>F. cherrug</i> | Tuva | SEC | Karyakin I.V. with colleagues |                                                            |
| 88 | GF_D004_2B_2018_Tuva         | <i>F. cherrug</i> | Tuva | SEC | Karyakin I.V. with colleagues |                                                            |
| 89 | GF_D010_3B_2018_Tuva         | <i>F. cherrug</i> | Tuva | SEC | Karyakin I.V. with colleagues |                                                            |
| 90 | <b>GF_D001_1B_2018_Tuva</b>  | <i>F. cherrug</i> | Tuva | SEC | Karyakin I.V. with colleagues | PX511677                                                   |
| 91 | GF_D013_48B_2018_Tuva        | <i>F. cherrug</i> | Tuva | SEC | Karyakin I.V. with colleagues |                                                            |
| 92 | GF_D014_49B_2018_Tuva        | <i>F. cherrug</i> | Tuva | SEC | Karyakin I.V. with colleagues |                                                            |
| 93 | <b>GF_D024_43B_2018_Tuva</b> | <i>F. cherrug</i> | Tuva | SEC | Karyakin I.V. with colleagues | PX511653<br>MT431205 <sup>1</sup><br>OM937748 <sup>2</sup> |
| 94 | <b>GF_D017_51B_2018_Tuva</b> | <i>F. cherrug</i> | Tuva | SEC | Karyakin I.V. with colleagues | PX511679                                                   |
| 95 | GF_D180_54B_2018_Tuva        | <i>F. cherrug</i> | Tuva | SEC | Karyakin I.V. with colleagues |                                                            |
| 96 | <b>GF_D019_53B_2018_Tuva</b> | <i>F. cherrug</i> | Tuva | SEC | Karyakin I.V. with colleagues | PX511654<br>MT431201 <sup>1</sup>                          |
| 97 | GF_D029_14B_2018_Tuva        | <i>F. cherrug</i> | Tuva | SEC | Karyakin I.V. with colleagues |                                                            |

|     |                              |                   |      |     |                               |          |
|-----|------------------------------|-------------------|------|-----|-------------------------------|----------|
| 98  | <b>GF_D028_13B_2018_Tuva</b> | <i>F. cherrug</i> | Tuva | SEC | Karyakin I.V. with colleagues | PX511681 |
| 99  | GF_CA68_FC43_2021_Tuva       | <i>F. cherrug</i> | Tuva | SEC | Karyakin I.V. with colleagues |          |
| 100 | GF_D391_FC44_2021_Tuva       | <i>F. cherrug</i> | Tuva | SEC | Karyakin I.V. with colleagues |          |
| 101 | GF_D393_FC46_2021_Tuva       | <i>F. cherrug</i> | Tuva | SEC | Karyakin I.V. with colleagues |          |
| 102 | GF_D392_FC45_2021_Tuva       | <i>F. cherrug</i> | Tuva | SEC | Karyakin I.V. with colleagues |          |
| 103 | GF_D386_FC63_2021_Tuva       | <i>F. cherrug</i> | Tuva | SEC | Karyakin I.V. with colleagues |          |
| 104 | GF_CA71_FC64_2021_Tuva       | <i>F. cherrug</i> | Tuva | SEC | Karyakin I.V. with colleagues |          |
| 105 | GF_CA64_FC33_2021_Tuva       | <i>F. cherrug</i> | Tuva | SEC | Karyakin I.V. with colleagues |          |
| 106 | GF_D408_FC34_2021_Tuva       | <i>F. cherrug</i> | Tuva | SEC | Karyakin I.V. with colleagues |          |
| 107 | GF_D409_FC35_2021_Tuva       | <i>F. cherrug</i> | Tuva | SEC | Karyakin I.V. with colleagues |          |
| 108 | GF_D413_FC36_2021_Tuva       | <i>F. cherrug</i> | Tuva | SEC | Karyakin I.V. with colleagues |          |
| 109 | <b>GF_D406_2017_Tuva</b>     | <i>F. cherrug</i> | Tuva | SEC | Karyakin I.V. with colleagues | PX511685 |
| 110 | GF_D403_2017_Tuva            | <i>F. cherrug</i> | Tuva | SEC | Karyakin I.V. with colleagues |          |
| 111 | GF_D408_2017_Tuva            | <i>F. cherrug</i> | Tuva | SEC | Karyakin I.V. with colleagues |          |
| 112 | GF_D410_2017_Tuva            | <i>F. cherrug</i> | Tuva | SEC | Karyakin I.V. with colleagues |          |
| 113 | GF_D045_9B_2018_Tuva         | <i>F. cherrug</i> | Tuva | SEC | Karyakin I.V. with colleagues |          |
| 114 | <b>GF_D047_11B_2018_Tuva</b> | <i>F. cherrug</i> | Tuva | SEC | Karyakin I.V. with colleagues | PX511684 |
| 115 | GF_CA60_FC27_2021_Tuva       | <i>F. cherrug</i> | Tuva | SEC | Karyakin I.V. with colleagues |          |
| 116 | GF_CA61_FC28_2021_Tuva       | <i>F. cherrug</i> | Tuva | SEC | Karyakin I.V. with colleagues |          |
| 117 | GF_D284_FC29_2021_Tuva       | <i>F. cherrug</i> | Tuva | SEC | Karyakin I.V. with colleagues |          |

|     |                               |                   |      |     |                               |                                   |
|-----|-------------------------------|-------------------|------|-----|-------------------------------|-----------------------------------|
| 118 | GF_D228_FC21-15_Tuva          | <i>F. cherrug</i> | Tuva | SEC | Karyakin I.V. with colleagues |                                   |
| 119 | GF_D229_FC21-16_Tuva          | <i>F. cherrug</i> | Tuva | SEC | Karyakin I.V. with colleagues |                                   |
| 120 | GF_D422_FC21-1_Tuva           | <i>F. cherrug</i> | Tuva | SEC | Karyakin I.V. with colleagues |                                   |
| 121 | GF_D423_FC21-2_Tuva           | <i>F. cherrug</i> | Tuva | SEC | Karyakin I.V. with colleagues |                                   |
| 122 | GF_D424_FC21-3_Tuva           | <i>F. cherrug</i> | Tuva | SEC | Karyakin I.V. with colleagues |                                   |
| 123 | GF_D425_FC21-4_Tuva           | <i>F. cherrug</i> | Tuva | SEC | Karyakin I.V. with colleagues |                                   |
| 124 | GF_D025_32B_2018_Tuva         | <i>F. cherrug</i> | Tuva | SEC | Karyakin I.V. with colleagues |                                   |
| 125 | <b>GF_D027_26B_2018_Tuva</b>  | <i>F. cherrug</i> | Tuva | SEC | Karyakin I.V. with colleagues | PX511680                          |
| 126 | GF_CA66_FC40_2021_Tuva        | <i>F. cherrug</i> | Tuva | SEC | Karyakin I.V. with colleagues |                                   |
| 127 | GF_CA67_FC41_2021_Tuva        | <i>F. cherrug</i> | Tuva | SEC | Karyakin I.V. with colleagues |                                   |
| 128 | GF_D379_FC42_2021_Tuva        | <i>F. cherrug</i> | Tuva | SEC | Karyakin I.V. with colleagues |                                   |
| 129 | GF_D378_FC39_2021_Tuva        | <i>F. cherrug</i> | Tuva | SEC | Karyakin I.V. with colleagues |                                   |
| 130 | GF_CA62_FC30_2021_Tuva        | <i>F. cherrug</i> | Tuva | SEC | Karyakin I.V. with colleagues |                                   |
| 131 | GF_CA63_FC31_2021_Tuva        | <i>F. cherrug</i> | Tuva | SEC | Karyakin I.V. with colleagues |                                   |
| 132 | GF_D242_FC32_2021_Tuva        | <i>F. cherrug</i> | Tuva | SEC | Karyakin I.V. with colleagues |                                   |
| 133 | GF_TUV-16_2017_Tuva           | <i>F. cherrug</i> | Tuva | SEC | Karyakin I.V. with colleagues |                                   |
| 134 | GF_D401_2017_Tuva             | <i>F. cherrug</i> | Tuva | SEC | Karyakin I.V. with colleagues |                                   |
| 135 | GF_D407_2017_Tuva             | <i>F. cherrug</i> | Tuva | SEC | Karyakin I.V. with colleagues |                                   |
| 136 | <b>GF_D413_2017_Tuva</b>      | <i>F. cherrug</i> | Tuva | SEC | Karyakin I.V. with colleagues | PX511686                          |
| 137 | <b>GF_D172_172B_2018_Tuva</b> | <i>F. cherrug</i> | Tuva | SEC | Karyakin I.V. with colleagues | PX511656<br>MT431199 <sup>1</sup> |

|     |                                       |                   |      |     |                               |          |
|-----|---------------------------------------|-------------------|------|-----|-------------------------------|----------|
| 138 | <b>MF_81-FC_FC-RT292-1_2014_Tuva</b>  | <i>F. cherrug</i> | Tuva | SEC | Karyakin I.V. with colleagues | PX511688 |
| 139 | MF_87-FC_FC-RT290-1_2014_Tuva         | <i>F. cherrug</i> | Tuva | SEC | Karyakin I.V. with colleagues |          |
| 140 | MF_A45-MK_FC-RT287-1_2014_Tuva        | <i>F. cherrug</i> | Tuva | SEC | Karyakin I.V. with colleagues |          |
| 141 | <b>MF_A18-MK_FC-RT286-1_2014_Tuva</b> | <i>F. cherrug</i> | Tuva | SEC | Karyakin I.V. with colleagues | PX511690 |
| 142 | <b>MF_FC-RT208-1_BH10_2006_Tuva</b>   | <i>F. cherrug</i> | Tuva | SEC | Karyakin I.V. with colleagues | PX511689 |
| 143 | <b>MF_FC097_FC-RT5-2_2010_Tuva</b>    | <i>F. cherrug</i> | Tuva | SEC | Karyakin I.V. with colleagues | PX511691 |
| 144 | <b>MF_FC10_FC-RT188-1_2006_Tuva</b>   | <i>F. cherrug</i> | Tuva | SEC | Karyakin I.V. with colleagues | PX511692 |
| 145 | MF_FC23_FC-RT183-2_2005_Tuva          | <i>F. cherrug</i> | Tuva | SEC | Karyakin I.V. with colleagues |          |
| 146 | <b>MF_FC-28_FC-RT38-1_2005_Tuva</b>   | <i>F. cherrug</i> | Tuva | SEC | Karyakin I.V. with colleagues | PX511693 |
| 147 | <b>MF_FC-29_FC-RT39-1_2005_Tuva</b>   | <i>F. cherrug</i> | Tuva | SEC | Karyakin I.V. with colleagues | PX511694 |
| 148 | <b>MF_FC29_FC-RT39-1_2010_Tuva</b>    | <i>F. cherrug</i> | Tuva | SEC | Karyakin I.V. with colleagues | PX511695 |
| 149 | MF_FC39A_FC-RT231-2_2010_Tuva         | <i>F. cherrug</i> | Tuva | SEC | Karyakin I.V. with colleagues |          |
| 150 | <b>MF_FC39A_FC-RT231-2_2014_Tuva</b>  | <i>F. cherrug</i> | Tuva | SEC | Karyakin I.V. with colleagues | PX511696 |
| 151 | <b>MF_FC7_FC-RT169-1_2010_Tuva</b>    | <i>F. cherrug</i> | Tuva | SEC | Karyakin I.V. with colleagues | PX511697 |
| 152 | <b>MF_FC7_FC-RT169-1_2011_Tuva</b>    | <i>F. cherrug</i> | Tuva | SEC | Karyakin I.V. with colleagues | PX511698 |
| 153 | MF_FC-J06_FC-RT242-1_2008_Tuva        | <i>F. cherrug</i> | Tuva | SEC | Karyakin I.V. with colleagues |          |
| 154 | <b>MF_FC-L1_FC-RT275-1_2011_Tuva</b>  | <i>F. cherrug</i> | Tuva | SEC | Karyakin I.V. with colleagues | PX511699 |
| 155 | MF_FC6_FC-RT18-1_2008_Tuva            | <i>F. cherrug</i> | Tuva | SEC | Karyakin I.V. with colleagues |          |
| 156 | MF_FC-A3_FC-RT226-1_2006_Tuva         | <i>F. cherrug</i> | Tuva | SEC | Karyakin I.V. with colleagues |          |
| 157 | MF_FC11_FC-RT10-2_2005_Tuva           | <i>F. cherrug</i> | Tuva | SEC | Karyakin I.V. with colleagues |          |

|     |                                    |                   |        |     |                               |          |
|-----|------------------------------------|-------------------|--------|-----|-------------------------------|----------|
| 158 | MF_FC19_FC-RT12-2_2006_Tuva        | <i>F. cherrug</i> | Tuva   | SEC | Karyakin I.V. with colleagues |          |
| 159 | MF_FC22A_FC-RT151-2_2005_Tuva      | <i>F. cherrug</i> | Tuva   | SEC | Karyakin I.V. with colleagues |          |
| 160 | MF_BH11A_FC-RT153-1_2014_Tuva      | <i>F. cherrug</i> | Tuva   | SEC | Karyakin I.V. with colleagues |          |
| 161 | MF_FC10_FC-RT188-1_2010_Tuva       | <i>F. cherrug</i> | Tuva   | SEC | Karyakin I.V. with colleagues |          |
| 162 | MF_FC8_FC-RT202-1_2011_Tuva        | <i>F. cherrug</i> | Tuva   | SEC | Karyakin I.V. with colleagues |          |
| 163 | MF_FCT3_FC-RT204-2_2010_Tuva       | <i>F. cherrug</i> | Tuva   | SEC | Karyakin I.V. with colleagues |          |
| 164 | MF_A35-MK_FC-RT288-1_2014_Tuva     | <i>F. cherrug</i> | Tuva   | SEC | Karyakin I.V. with colleagues |          |
| 165 | MF_TUV-14_FC-RT289_2014_Tuva       | <i>F. cherrug</i> | Tuva   | SEC | Karyakin I.V. with colleagues |          |
| 166 | MF_FC28_FC-RT38-1_2010_Tuva        | <i>F. cherrug</i> | Tuva   | SEC | Karyakin I.V. with colleagues |          |
| 167 | MF_FC30_FC-RT40-1_2008_Tuva        | <i>F. cherrug</i> | Tuva   | SEC | Karyakin I.V. with colleagues |          |
| 168 | MF_FC35A_FC-RT54-4_2005_Tuva       | <i>F. cherrug</i> | Tuva   | SEC | Karyakin I.V. with colleagues |          |
| 169 | MF_FC098_12062005_Tuva             | <i>F. cherrug</i> | Tuva   | SEC | Karyakin I.V. with colleagues |          |
| 170 | MF_FC10_27062011_Tuva              | <i>F. cherrug</i> | Tuva   | SEC | Karyakin I.V. with colleagues |          |
| 171 | MF_FC16A_18062006_Tuva             | <i>F. cherrug</i> | Tuva   | SEC | Karyakin I.V. with colleagues |          |
| 172 | MF_FCJ14_21062008_Tuva             | <i>F. cherrug</i> | Tuva   | SEC | Karyakin I.V. with colleagues |          |
| 173 | MF_Saigyn_01062010_Tuva            | <i>F. cherrug</i> | Tuva   | SEC | Karyakin I.V. with colleagues |          |
| 174 | <b>MF_FC3_FC-ZK5-1_2010_Dauria</b> | <i>F. cherrug</i> | Dauria | SEC | Karyakin I.V. with colleagues | PX511700 |
| 175 | MF_L-T2_28072010_Dauria            | <i>F. cherrug</i> | Dauria | SEC | Karyakin I.V. with colleagues |          |
| 176 | MS_MO58_R-110648_1988_Dauria       | <i>F. cherrug</i> | Dauria | ZM  | Rozhkova D.N., Zinevich L.S.  |          |
| 177 | <b>GF_D287_2017_Altai</b>          | <i>F. cherrug</i> | Altai  | SEC | Karyakin I.V. with colleagues | PX511649 |

|     |                                                             |                      |          |     |                               |                                   |
|-----|-------------------------------------------------------------|----------------------|----------|-----|-------------------------------|-----------------------------------|
| 178 | <b>GF_D316_2017_Altai</b>                                   | <i>F. cherrug</i>    | Altai    | SEC | Karyakin I.V. with colleagues | PX511650                          |
| 179 | <b>MF_BH-UK4_BH-RA103-1_Altai_2008</b>                      | <i>F. cherrug</i>    | Altai    | SEC | Karyakin I.V. with colleagues | PX511701                          |
| 180 | <b>MF_AN-LL28_AN-RA214-1_Altai_2014</b>                     | <i>F. cherrug</i>    | Altai    | SEC | Karyakin I.V. with colleagues | PX511702                          |
| 181 | <b>GF_D321_2017_Altai</b>                                   | <i>F. cherrug</i>    | Altai    | SEC | Karyakin I.V. with colleagues | PX511651                          |
| 182 | <b>GF_D314_6B_2018_altaicus</b> ‘Altai falcon’<br>falconry  | <i>F. cherrug</i>    | Altai    | SEC | Karyakin I.V. with colleagues | PX511657<br>MT431206 <sup>1</sup> |
| 183 | <b>GF_D319_16B_2018_altaicus</b> ‘Altai falcon’<br>falconry | <i>F. cherrug</i>    | Altai    | SEC | Karyakin I.V. with colleagues | PX511658<br>MT431200 <sup>1</sup> |
| 184 | <b>GF_D038_23B_2018_altaicus</b> ‘Vitasphera’<br>falconry   | <i>F. cherrug</i>    | Altai    | SEC | Karyakin I.V. with colleagues | PX511659<br>MT431202 <sup>1</sup> |
| 185 | <b>GF_D033_47B_2018_altaicus</b> ‘Vitasphera’<br>falconry   | <i>F. cherrug</i>    | Altai    | SEC | Karyakin I.V. with colleagues | PX511660<br>MT431203 <sup>1</sup> |
| 186 | MS_FR_R21515_Menzbier's_Kamchatka                           | <i>F. rusticolus</i> | Far East | ZM  | Rozhkova D.N., Zinevich L.S.  |                                   |
| 187 | MS_FR_R95275_Dementiev's_Komandorski                        | <i>F. rusticolus</i> | Far East | ZM  | Rozhkova D.N., Zinevich L.S.  |                                   |
| 188 | MS_FR_R95278_1933_Koryakia                                  | <i>F. rusticolus</i> | Far East | ZM  | Rozhkova D.N., Zinevich L.S.  |                                   |
| 189 | MS_FR_R95268_1941_Kamchatka                                 | <i>F. rusticolus</i> | Far East | ZM  | Rozhkova D.N., Zinevich L.S.  |                                   |
| 190 | MS_FR_R95272_1945_Kamchatka                                 | <i>F. rusticolus</i> | Far East | ZM  | Rozhkova D.N., Zinevich L.S.  |                                   |
| 191 | MS_FR_R72620_1949_Kamchatka                                 | <i>F. rusticolus</i> | Far East | ZM  | Rozhkova D.N., Zinevich L.S.  |                                   |
| 192 | MS_FR_R95270_1950_Kamchatka                                 | <i>F. rusticolus</i> | Far East | ZM  | Rozhkova D.N., Zinevich L.S.  |                                   |
| 193 | MS_FR_R95267_1951_Kamchatka                                 | <i>F. rusticolus</i> | Far East | ZM  | Rozhkova D.N., Zinevich L.S.  |                                   |
| 194 | MS_FR_R97559_1973_Kamchatka                                 | <i>F. rusticolus</i> | Far East | ZM  | Rozhkova D.N., Zinevich L.S.  |                                   |
| 195 | MS_FR_R97560_1973_Kamchatka                                 | <i>F. rusticolus</i> | Far East | ZM  | Rozhkova D.N., Zinevich L.S.  |                                   |
| 196 | MS_FR_R132286_2006_Chukotka                                 | <i>F. rusticolus</i> | Far East | ZM  | Rozhkova D.N., Zinevich L.S.  |                                   |
| 197 | MS_FR_R127174_2009_Kamchatka                                | <i>F. rusticolus</i> | Far East | ZM  | Rozhkova D.N., Zinevich L.S.  |                                   |

|     |                                       |                      |          |      |                              |                                                            |
|-----|---------------------------------------|----------------------|----------|------|------------------------------|------------------------------------------------------------|
| 198 | MS_FR_R127175_2009_Kamchatka          | <i>F. rusticolus</i> | Far East | ZM   | Rozhkova D.N., Zinevich L.S. |                                                            |
| 199 | MS_FR_R133255_2014_Chukotka           | <i>F. rusticolus</i> | Far East | ZM   | Rozhkova D.N., Zinevich L.S. |                                                            |
| 200 | ACF_12-KAM-19_2019_Kamchatka          | <i>F. rusticolus</i> | Far East | ARIE | Dorofeev D.S., Sorokin A.G.  |                                                            |
| 201 | <b>ACF_13-KAM-19_2019_Kamchatka</b>   | <i>F. rusticolus</i> | Far East | ARIE | Dorofeev D.S., Sorokin A.G.  | PX511664<br>OM937745 <sup>2</sup>                          |
| 202 | ACF_14-KAM-19_2019_Kamchatka          | <i>F. rusticolus</i> | Far East | ARIE | Dorofeev D.S., Sorokin A.G.  |                                                            |
| 203 | <b>ACF_6-KAM-19_2019_Kamchatka</b>    | <i>F. rusticolus</i> | Far East | ARIE | Dorofeev D.S., Sorokin A.G.  | PX511663                                                   |
| 204 | <b>CF_Chuk_N1_2019_Chukotka</b>       | <i>F. rusticolus</i> | Far East | ARIE | Sarychev E.I., Sorokin A.G.  | PX511661                                                   |
| 205 | CF_Chuk_N2_2019_Chukotka              | <i>F. rusticolus</i> | Far East | ARIE | Sarychev E.I., Sorokin A.G.  |                                                            |
| 206 | CF_Chuk_N3_2019_Chukotka              | <i>F. rusticolus</i> | Far East | ARIE | Sarychev E.I., Sorokin A.G.  |                                                            |
| 207 | CF_Chuk_N4_2019_Chukotka              | <i>F. rusticolus</i> | Far East | ARIE | Sarychev E.I., Sorokin A.G.  |                                                            |
| 208 | <b>CF_Chuk_N5_2019_Chukotka</b>       | <i>F. rusticolus</i> | Far East | ARIE | Sarychev E.I., Sorokin A.G.  | PX511662<br>MT431197 <sup>1</sup>                          |
| 209 | <b>ACF_Kamchatka N1_2014_Far East</b> | <i>F. rusticolus</i> | Far East | ARIE | Sorokin A.G. with colleagues | PX511665                                                   |
| 210 | ACF_Kamchatka N2_2014_Far East        | <i>F. rusticolus</i> | Far East | ARIE | Sorokin A.G. with colleagues |                                                            |
| 211 | ACF_Kamchatka N3_2014_Far East        | <i>F. rusticolus</i> | Far East | ARIE | Sorokin A.G. with colleagues |                                                            |
| 212 | ACF_Kamchatka N4_2019_Far East        | <i>F. rusticolus</i> | Far East | ARIE | Sorokin A.G. with colleagues |                                                            |
| 213 | ACF_Kamchatka N5_2019_Far East        | <i>F. rusticolus</i> | Far East | ARIE | Sorokin A.G. with colleagues |                                                            |
| 214 | <b>ACF_Kamchatka N6_2019_Far East</b> | <i>F. rusticolus</i> | Far East | ARIE | Sorokin A.G. with colleagues | PX511666<br>MT431198 <sup>1</sup><br>OM937744 <sup>2</sup> |
| 215 | <b>ACF_Kamchatka N7_2019_Far East</b> | <i>F. rusticolus</i> | Far East | ARIE | Sorokin A.G. with colleagues | PX511667<br>OM937743 <sup>2</sup>                          |

**Supplementary Table S2.** DNA extraction methods.

| Type of material                                                      | DNA source                                                 | DNA extraction kit                       | Features of the extraction                                                  |
|-----------------------------------------------------------------------|------------------------------------------------------------|------------------------------------------|-----------------------------------------------------------------------------|
| Skin from museum specimens                                            | Small crushed dry tissue samples                           | TIANamp Genomic DNA Kit (Teangen, China) | Relatively long lysis for tissue rehydration, >12 h                         |
| Molted feathers                                                       | Umbilicus dry blood from the superior calamus <sup>3</sup> | Diatom DNA Prep 100 (Biokom, Russia)     | Sample preparation, relatively long lysis for blood clot rehydration, >12 h |
| Preserved growing feathers/alcohol-preserved and dry contour feathers | Part of pulp/calamus with skin cells                       | DNA-Extran-2 kit (Syntol, Russia)        | Drying stage from alcohol                                                   |

**Supplementary Table S3.** Set of primers designed for mitochondrial DNA amplification. NC\_026715.1: GenBank accession number for the reference mitochondrial genome of the saker falcon. Nucleotide positions of studied sequences in NC\_026715.1: cytochrome *b* gene (13714 – 14856), tRNA-Thr (14857 – 14927), the control region (14928 – 16447).

| Primer pair, forward (F) and reverse (R) | Sequence (5'→3')           | Nucleotide positions in NC_026715.1 | Annealing temperature (°C) | Fragment size, bp |
|------------------------------------------|----------------------------|-------------------------------------|----------------------------|-------------------|
| FCB1F                                    | ATCAATCCTAACTATCCTACTC     | 13675 – 13994                       | 55-60                      | 320               |
| FCB3R                                    | GCATCCTTATTCTTCATCTG       |                                     | 52-57                      |                   |
| FCB3F                                    | GACTAATCCGCAACCTACATG      | 13946 – 14314                       | 57-62                      | 369               |
| FCB1R                                    | CCCTAATCCACCTCACCTTCC      |                                     | 60-65                      |                   |
| FCB2F                                    | ACTGACCCGATTCTTCGCCC       | 14238 – 14640                       | 59-64                      | 403               |
| FCB4R                                    | CTAAGCCCTCTACTTCAC         |                                     | 50-55                      |                   |
| FCB4F                                    | CCGCCTCAGTGCTAATCC         | 14600 – 14945                       | 53-58                      | 346               |
| FCB2R                                    | CCCACCAACCACACACCC         |                                     | 55-60                      |                   |
| FCR3F                                    | AGTCCTAGCACTAGCCGCCTCAG    | 14586 – 14966                       | 63-68                      | 381               |
| FCR3R                                    | AATAAAAACAATCTTCCCCC       |                                     | 50-55                      |                   |
| FCR4F                                    | TTGTAAACCAAAGAGTGAAGG      | 14887 – 15239                       | 53-58                      | 353               |
| FCR4R                                    | ATTACCCCATACATGATAACTCAATG |                                     | 60-65                      |                   |

|       |                        |               |       |     |
|-------|------------------------|---------------|-------|-----|
| FCR2F | CCCATTATGTATTACTTTGC   | 15184 – 15598 | 50-55 | 415 |
| FCR1R | CATTACACGACCAGCGTCAG   |               | 57-62 |     |
| FCD3F | ACTAAACCCATGCCCTGTAT   | 15263 – 15776 | 53-58 | 514 |
| FCD3R | CTTTTGGGGCGGTTGGTTC    |               | 57-62 |     |
| FCD4F | GCCCTTCTCCGAGCCATCTG   | 15693 – 16070 | 53-58 | 378 |
| FCD4R | ACAAAACTTAAAACCCCTACCC |               | 63-68 |     |
| FCD5F | CGGTTTGCGTATTTGGAGTCA  | 15895 – 16544 | 57-62 | 650 |
| FCD5R | CCAATAAACCTAAACCGCCCGA |               | 61-66 |     |

---

**Supplementary Table S4.** Implemented modifications of two hypervariable repeat regions of the control region. Substitutions in repetitive elements are indicated in bold. Representative nucleotides for repeats exceeding four units are underlined.

| Optimized region                                                                                                                      | Original repetitive element sequence (5'-3')                                                                                                                                           | Implemented modification                                                                                                                                                                                                                                                                                                                                                                                                                                       |
|---------------------------------------------------------------------------------------------------------------------------------------|----------------------------------------------------------------------------------------------------------------------------------------------------------------------------------------|----------------------------------------------------------------------------------------------------------------------------------------------------------------------------------------------------------------------------------------------------------------------------------------------------------------------------------------------------------------------------------------------------------------------------------------------------------------|
| 5'- repeats ( <i>F. cherrug</i> , <i>F. rusticolus</i> )                                                                              | TTC <sub>5-6</sub> [flanking]<br>CATGCCAGCCCTAAGCTGGCATT <del>TTTT</del> TACCAAAAATAAATC<br>AACTTCCTTAAAATAAAGCCCCTCACCA [repetitive element]<br>C <sub>7</sub> [flanking]             | This fragment was excluded from analysis due to inconsistent PCR results, which prevented reliable sequence interpretation. Specifically, PCR products appeared as up to four distinct bands on an agarose gel. Sequencing of these bands revealed that they corresponded to fragments containing between 1 and 4 repetitive units.                                                                                                                            |
| 5'- repeats ( <i>F. peregrinus</i> NC_000878.1)                                                                                       | TT <sub>4</sub> C <sub>3</sub> [flanking]<br>CATGCCAGCCCCAAGCTGGCATT <del>TTTT</del> TACCAAAAACAAATC<br>AACTTCCCTAAAATAAAGCCCCTCACCA [repetitive element]<br>C <sub>7</sub> [flanking] | This fragment was modified in accordance with the procedure applied to the 5'- repeat region of original <i>F. cherrug</i> and <i>F. rusticolus</i> sequences.                                                                                                                                                                                                                                                                                                 |
| 3'- repeats containing more than four repetitive units ( <i>F. cherrug</i> , <i>F. rusticolus</i> , <i>F. peregrinus</i> NC_000878.1) | ACGCAATATTGCACTCCCCGGCGCTGGAGTTACATTAACA<br>ATTACACTTATTTTT [repetitive element]<br><br>ACGCAATATTGCACTCCCCAGCGCTGGAGTTACATTAACA<br>ATTACACTTATTTTT [repetitive element]               | Each of these repetitive elements exceeding four units was converted into <u>a single representative nucleotide "A"</u> . This allowed each such unit to be treated as a single evolutionary event.<br><br>Each of these repetitive elements (with one substitution), if longer than four units, was converted into <u>the representative dinucleotide "AC"</u> . This allowed such repetitive units to be represented as two independent evolutionary events. |

ACGCAATATTGCACTCCCCGGCGCTGAAGTTACATTAACA  
ATTACACTTATTTTT [repetitive element]

Each of these repetitive elements (with one substitution), if it was the fifth unit, was converted into the representative dinucleotide "AG". This allowed such repetitive units to be represented as two independent evolutionary events.

ACGCAACATTGCACTCCCCGGCGCTGGAGTTACATTAACA  
ATTACACTTATTTTT [repetitive element]

Each of these repetitive elements (with one substitution), if longer than four units, was converted into the representative dinucleotide "AT". This allowed such repetitive units to be represented as two independent evolutionary events.

ACGCAATATTGCACTCCCCGGCACTGGAGTTACATTAACA  
ATTACACTTATTTTT [repetitive element]

Each of these repetitive elements (with one substitution), if longer than four units, was converted into the representative dinucleotide "AA". This allowed such repetitive units to be represented as two independent evolutionary events.

ACGCAATATTGCACTCCCCGGCGCTGGAGTTACATTAACA  
ATCACACTTATTTTT [repetitive element]

Each of these repetitive elements (with one substitution), if it was after the fifth unit, was converted into the representative dinucleotide "AG". This allowed such repetitive units to be represented as two independent evolutionary events.

ACGCAATATTGCACTCCCCAGCACTGGAGTTACATTAACA  
ATTACACTTATTTTT [repetitive element]

Each of these repetitive elements (with two substitutions), if longer than four units, was converted into the representative trinucleotide "AAC". This allowed such repetitive units to be represented as three independent evolutionary events.

---

**Supplementary Table S5.** Optimized BEAUti<sup>4</sup> parameter settings.

| <b>Prior/operator</b>                  | <b>Default value</b>          | <b>Optimized value</b>        |
|----------------------------------------|-------------------------------|-------------------------------|
| birthDeath.sampleProbability betaPrior | shape="1.0", shapeB="1.0"     | shape="1.0", shapeB="2.0"     |
| wideExchange                           | weight="3"                    | weight="1"                    |
| wilsonBalding                          | weight="3"                    | weight="1"                    |
| birthDeath.sampleProbability           | windowSize="0.75", weight="3" | windowSize="0.05", weight="1" |

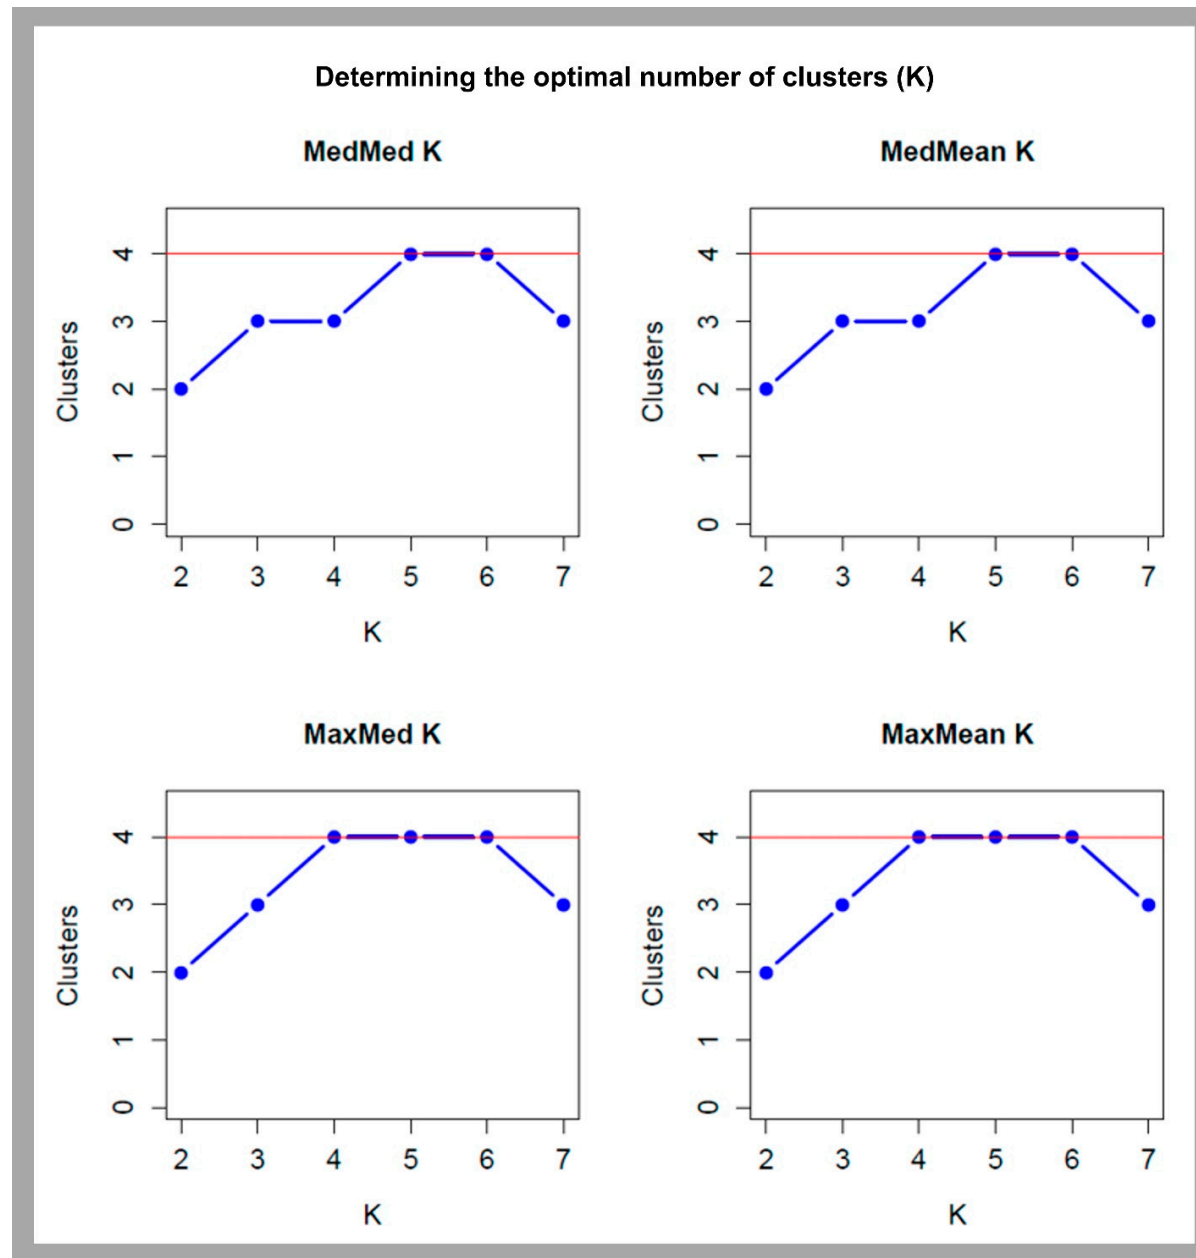

**Supplementary Figure S3.** Estimation of optimal K using the Puechmaille method<sup>5</sup> implemented in the StructureSelector server<sup>6</sup>.

**Supplementary Table S6.** Estimated posterior probabilities for numbers of genetic clusters (K) across 10 independent Geneland<sup>7</sup> runs.

| Run | Selected K (% support) | Log posterior probability (sorted ↓) |
|-----|------------------------|--------------------------------------|
| 2   | 4 (62.75%)             | -5756.16732751395                    |
| 6   | 4 (55.875%)            | -5825.93761148949                    |
| 10  | 4 (57.625%)            | -5926.81420664959                    |
| 7   | 4 (47.25%)             | -6058.79933882352                    |
| 4   | 3 (58.875%)            | -6163.20528888383                    |
| 9   | 3 (59%)                | -6206.64290426688                    |
| 3   | 3 (52.625%)            | -6221.19044872243                    |
| 5   | 3 (65.75%)             | -6275.11689101992                    |
| 8   | 3 (69%)                | -6299.31061430213                    |
| 1   | 3 (65.375%)            | -6300.09004904406                    |

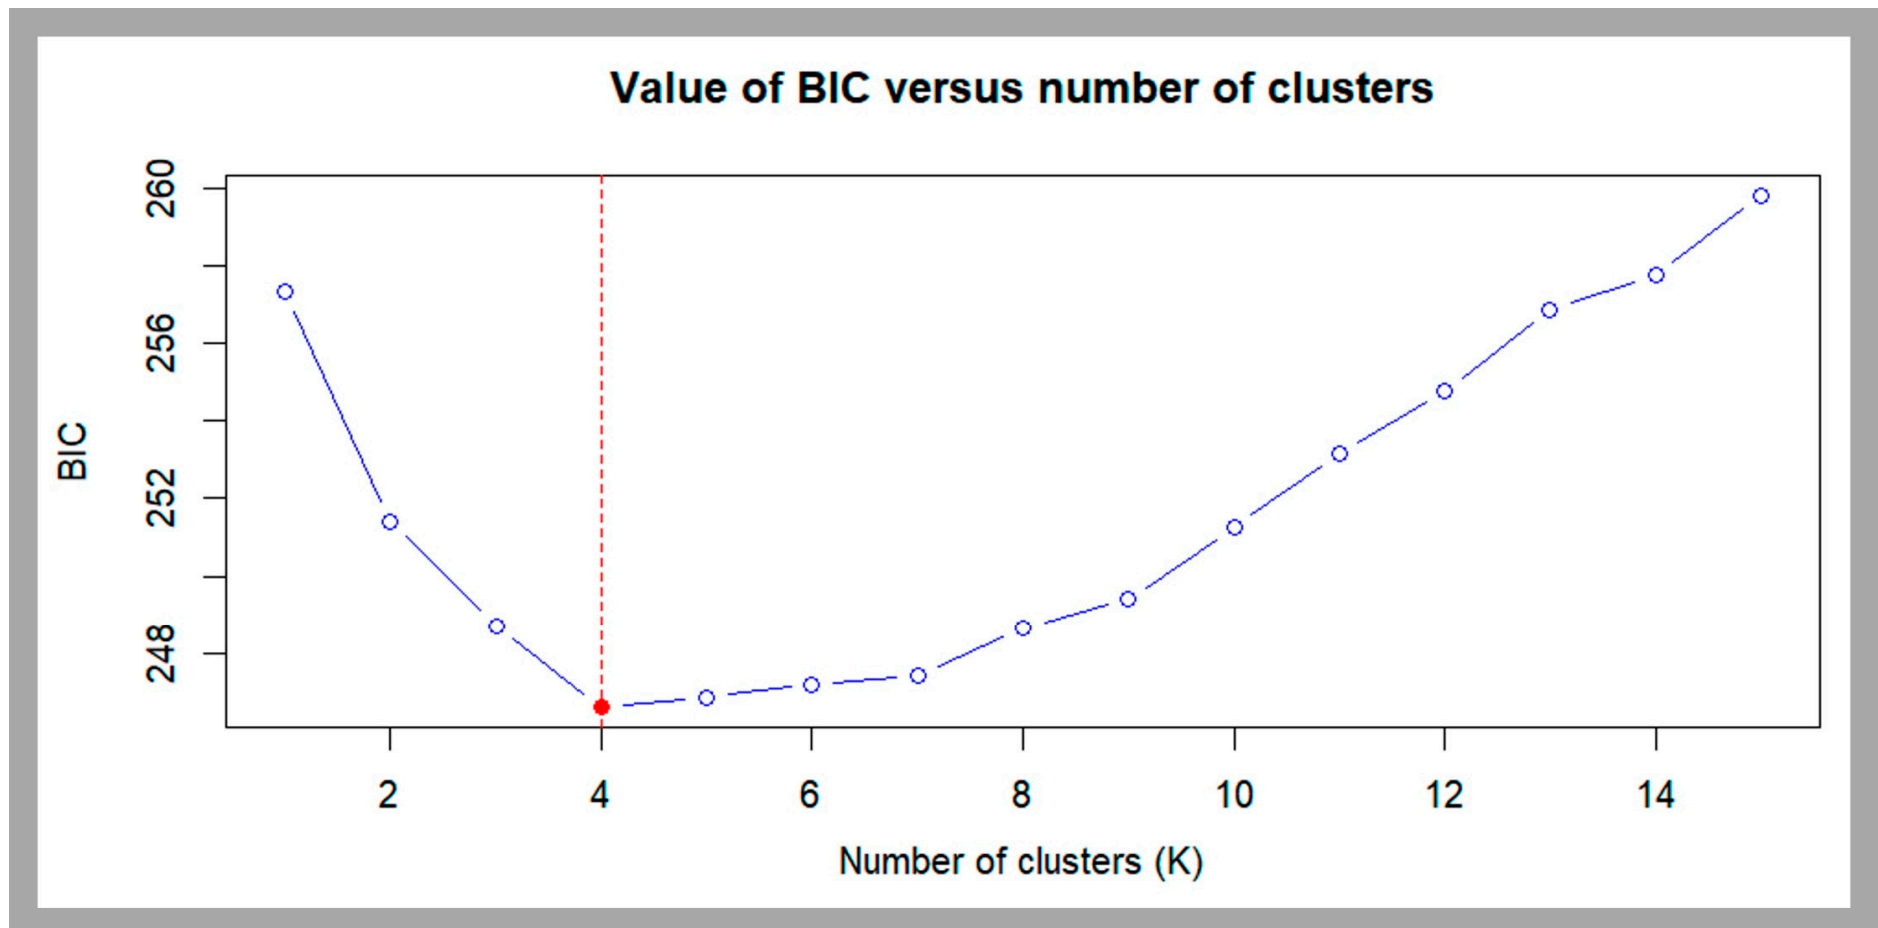

**Supplementary Figure S4.** BIC-based cluster estimation (*find.clusters*, *adegetnet*)<sup>8</sup> in R v4.4.3 with visualization in RStudio v2024.12.1.563. The optimal K value is indicated by the vertical red line.

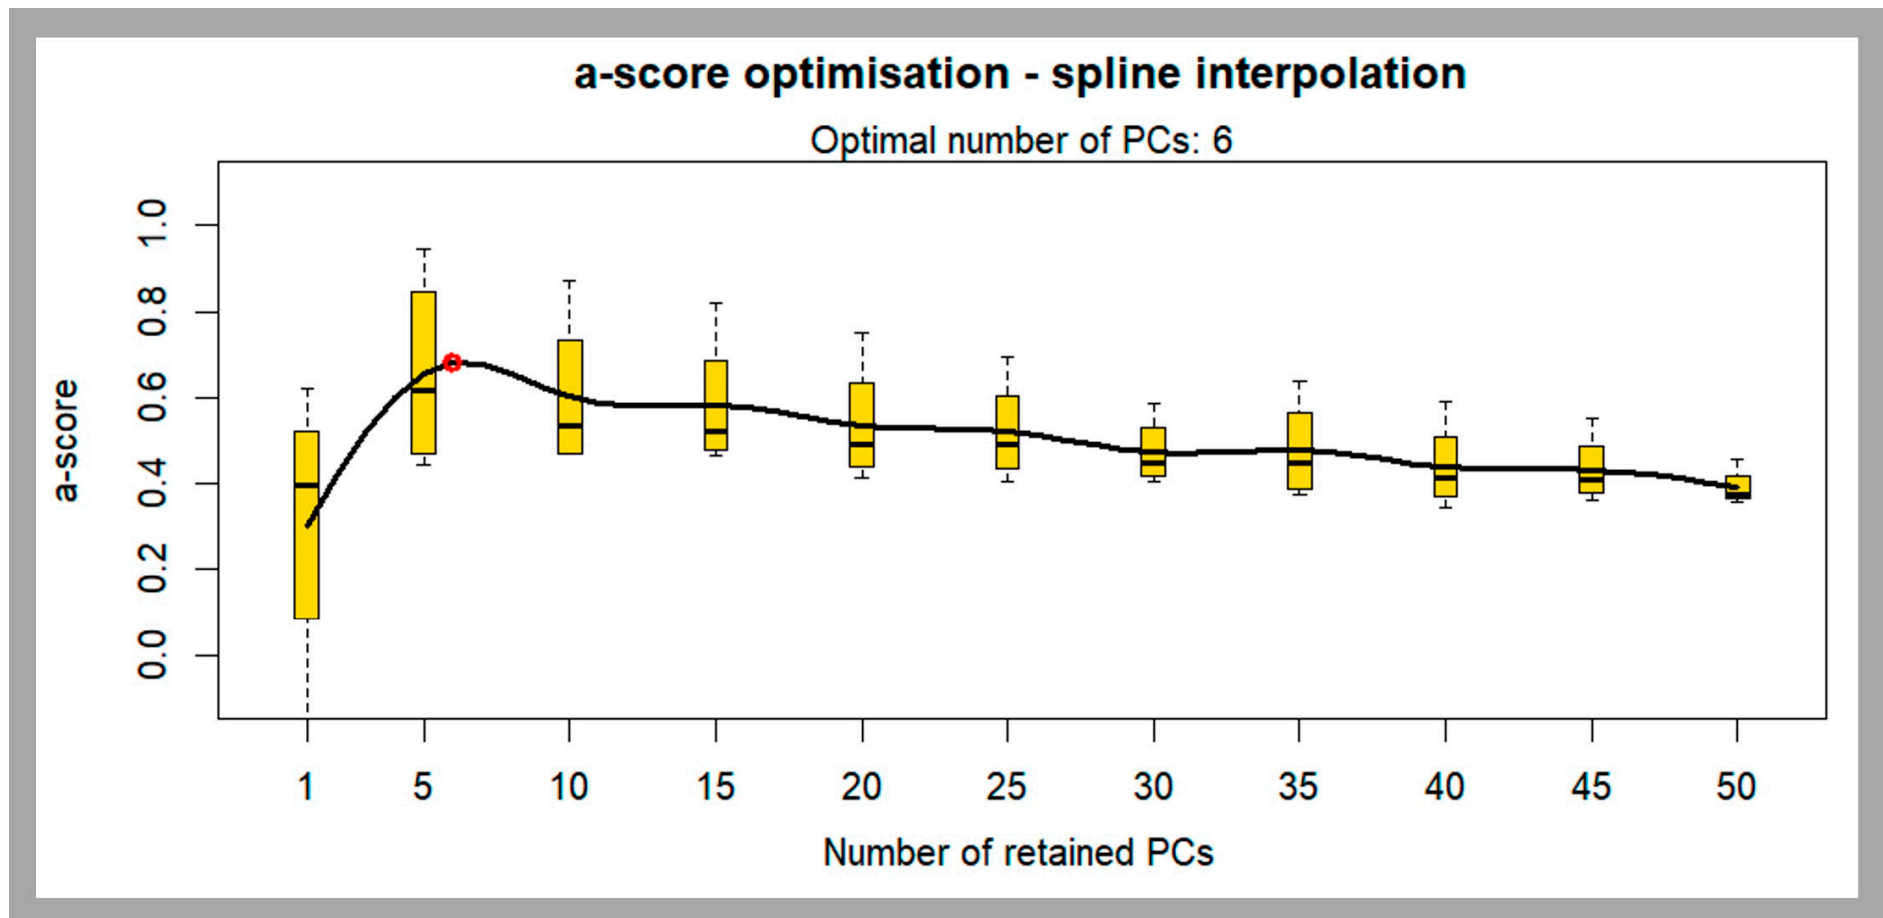

**Supplementary Figure S5.** Estimation of the optimal number of PCs (*optim.a.score*, adegenet)<sup>8</sup> in R v4.4.3 with visualization in RStudio v2024.12.1.563. The optimal number of PCs is indicated by the red circle.

**Supplementary Table S7.** Cross-validation of STRUCTURE<sup>9</sup> and DAPC<sup>8</sup> outputs. STRUCTURE membership probabilities refer to admixture coefficients. DAPC membership probabilities refer to individual proximities to the different clusters. PP – predefined population labels (prior information) used for the analyses. Identified genetic clusters represent the following individuals: (2) Tuvan *F. cherrug*; (3) exclusively *cherrug*-phenotype *F. cherrug* from Khakassia; (4) *F. rusticolus*; (1) eastern European *F. cherrug*; (I) *F. rusticolus*; (II) eastern European and contemporary Khakassian *F. cherrug*; (III-IV) individuals from all predefined populations. Core samples, defined as those comprising > 50% of individual from DAPC predefined populations, are indicated in bold. Samples marked by asterisks represent admixed individuals. Values highlighted in red indicate discordance between cluster assignments and membership probabilities. Color-coding of cluster assignments is as follows: (I) light purple; (II) light blue; (III) light green; (IV) uncolored.

| №  | Species           | Population     | ID sample                   | PP labels<br>(STRUCTURE /<br>DAPC) | STRUCTURE membership probabilities |           |           |           | DAPC cluster | DAPC membership probabilities |            |             |            |
|----|-------------------|----------------|-----------------------------|------------------------------------|------------------------------------|-----------|-----------|-----------|--------------|-------------------------------|------------|-------------|------------|
|    |                   |                |                             |                                    | Cluster 2                          | Cluster 3 | Cluster 4 | Cluster 1 |              | Cluster I                     | Cluster II | Cluster III | Cluster IV |
| 1  | <i>F. cherrug</i> | Eastern Europe | MS_MO2_R-21649_1910_Crimea  | 1 / 1                              | 0.08                               | 0.05      | 0.02      | 0.85      | IV           | 0.00                          | 0.23       | 0.00        | 0.77       |
| 2  | <i>F. cherrug</i> | Eastern Europe | MS_MO10_R-21650_1916_Crimea | 1 / 1                              | 0.03                               | 0.06      | 0.01      | 0.90      | II           | 0.00                          | 0.82       | 0.00        | 0.18       |
| 3  | <i>F. cherrug</i> | Eastern Europe | MF_FC23_2015_Crimea         | 2 / 1                              | 0.02                               | 0.00      | 0.01      | 0.97      | II           | 0.00                          | 1.00       | 0.00        | 0.00       |
| 4  | <i>F. cherrug</i> | Eastern Europe | MF_FC25_2015_Crimea         | 2 / 1                              | 0.01                               | 0.00      | 0.02      | 0.97      | III          | 0.00                          | 0.08       | 0.91        | 0.00       |
| 5  | <i>F. cherrug</i> | Eastern Europe | MF_FC41_2015_Crimea         | 2 / 1                              | 0.01                               | 0.00      | 0.01      | 0.97      | II           | 0.00                          | 0.84       | 0.14        | 0.02       |
| 6  | <i>F. cherrug</i> | Eastern Europe | MF_SFC09_2019_Crimea        | 2 / 1                              | 0.04                               | 0.01      | 0.02      | 0.94      | III          | 0.00                          | 0.15       | 0.85        | 0.00       |
| 7  | <i>F. cherrug</i> | Eastern Europe | MF_ZFC10_2019_Crimea*       | 2 / 1                              | 0.01                               | 0.00      | 0.88      | 0.10      | IV           | 0.14                          | 0.00       | 0.00        | 0.86       |
| 8  | <i>F. cherrug</i> | Eastern Europe | MS_MO11_R-7214_1921_Tula    | 1 / 1                              | 0.04                               | 0.14      | 0.01      | 0.81      | II           | 0.00                          | 1.00       | 0.00        | 0.00       |
| 9  | <i>F. cherrug</i> | Eastern Europe | MS_MO12_R-7211_1927_Tula    | 1 / 1                              | 0.04                               | 0.06      | 0.02      | 0.89      | II           | 0.00                          | 1.00       | 0.00        | 0.00       |
| 10 | <i>F. cherrug</i> | Eastern Europe | MS_MO13_R-33539_1922_Tula   | 1 / 1                              | 0.03                               | 0.06      | 0.03      | 0.88      | III          | 0.00                          | 0.36       | 0.60        | 0.03       |
| 11 | <i>F. cherrug</i> | Eastern Europe | MS_MO14_R-7215_1923_Tula    | 1 / 1                              | 0.07                               | 0.07      | 0.02      | 0.84      | III          | 0.00                          | 0.00       | 1.00        | 0.00       |
| 12 | <i>F. cherrug</i> | Eastern Europe | MS_MO17_R-33538_1922_Tula   | 1 / 1                              | 0.03                               | 0.09      | 0.02      | 0.87      | II           | 0.00                          | 0.80       | 0.20        | 0.00       |
| 13 | <i>F. cherrug</i> | Eastern Europe | MS_MO20_R-96895_1938_Tula   | 1 / 1                              | 0.08                               | 0.05      | 0.01      | 0.87      | II           | 0.00                          | 0.96       | 0.02        | 0.02       |
| 14 | <i>F. cherrug</i> | Eastern Europe | MS_MO24_R-24543_1927_Kursk  | 1 / 1                              | 0.05                               | 0.04      | 0.03      | 0.88      | II           | 0.00                          | 1.00       | 0.00        | 0.00       |
| 15 | <i>F. cherrug</i> | Eastern Europe | MS_MO25_R-24544_1927_Kursk  | 1 / 1                              | 0.08                               | 0.06      | 0.03      | 0.83      | III          | 0.00                          | 0.08       | 0.76        | 0.16       |
| 16 | <i>F. cherrug</i> | Khakassia      | MS_MO35_R-97697_1966_Khak   | 5 / 2                              | 0.11                               | 0.06      | 0.18      | 0.65      | II           | 0.00                          | 0.80       | 0.20        | 0.00       |
| 17 | <i>F. cherrug</i> | Khakassia      | MS_MO36_R-97701_1968_Khak   | 5 / 2                              | 0.06                               | 0.05      | 0.25      | 0.64      | I            | 0.52                          | 0.10       | 0.32        | 0.06       |
| 18 | <i>F. cherrug</i> | Khakassia      | MS_MO38_R-97700_1968_Khak   | 5 / 2                              | 0.08                               | 0.08      | 0.22      | 0.62      | II           | 0.00                          | 0.54       | 0.43        | 0.04       |
| 19 | <i>F. cherrug</i> | Khakassia      | MS_MO39_R-97703_1968_Khak   | 5 / 2                              | 0.10                               | 0.04      | 0.30      | 0.57      | IV           | 0.00                          | 0.18       | 0.01        | 0.80       |
| 20 | <i>F. cherrug</i> | Khakassia      | MS_MO40_R-97699_1968_Khak   | 5 / 2                              | 0.10                               | 0.04      | 0.24      | 0.62      | IV           | 0.01                          | 0.36       | 0.04        | 0.60       |
| 21 | <i>F. cherrug</i> | Khakassia      | MS_MO41_R-97702_1968_Khak   | 5 / 2                              | 0.09                               | 0.06      | 0.20      | 0.64      | III          | 0.00                          | 0.05       | 0.95        | 0.00       |
| 22 | <i>F. cherrug</i> | Khakassia      | MS_MO42_R-97698_1968_Khak   | 5 / 2                              | 0.08                               | 0.04      | 0.17      | 0.71      | II           | 0.00                          | 0.59       | 0.41        | 0.00       |

|    |                   |           |                               |       |      |      |      |      |     |      |      |      |      |
|----|-------------------|-----------|-------------------------------|-------|------|------|------|------|-----|------|------|------|------|
| 23 | <i>F. cherrug</i> | Khakassia | MF_FC1_FC-RH35-1_2014_Khak    | 4 / 2 | 0.79 | 0.15 | 0.01 | 0.05 | IV  | 0.01 | 0.00 | 0.15 | 0.84 |
| 24 | <i>F. cherrug</i> | Khakassia | MF_AH-09_FC-RH30-1_2014_Khak* | 4 / 2 | 0.21 | 0.04 | 0.01 | 0.75 | III | 0.00 | 0.00 | 0.96 | 0.03 |
| 25 | <i>F. cherrug</i> | Khakassia | GF_D347_25_2016_Khak          | 4 / 2 | 0.76 | 0.19 | 0.00 | 0.05 | IV  | 0.00 | 0.01 | 0.03 | 0.96 |
| 26 | <i>F. cherrug</i> | Khakassia | GF_D308_20_2016_Khak          | 4 / 2 | 0.89 | 0.08 | 0.01 | 0.02 | IV  | 0.03 | 0.00 | 0.08 | 0.89 |
| 27 | <i>F. cherrug</i> | Khakassia | GF_D400_2020_Khak             | 4 / 2 | 0.01 | 0.99 | 0.00 | 0.00 | II  | 0.00 | 1.00 | 0.00 | 0.00 |
| 28 | <i>F. cherrug</i> | Khakassia | GF_probe-17_2016_Khak         | 4 / 2 | 0.04 | 0.91 | 0.04 | 0.01 | II  | 0.00 | 1.00 | 0.00 | 0.00 |
| 29 | <i>F. cherrug</i> | Khakassia | GF_D310_23_2016_Khak          | 4 / 2 | 0.10 | 0.89 | 0.00 | 0.02 | II  | 0.00 | 1.00 | 0.00 | 0.00 |
| 30 | <i>F. cherrug</i> | Khakassia | GF_D350_7_2016_Khak           | 4 / 2 | 0.02 | 0.97 | 0.00 | 0.00 | II  | 0.00 | 0.98 | 0.02 | 0.00 |
| 31 | <i>F. cherrug</i> | Khakassia | GF_N1_FC75_2021_Khak          | 4 / 2 | 0.02 | 0.97 | 0.00 | 0.01 | III | 0.00 | 0.16 | 0.84 | 0.00 |
| 32 | <i>F. cherrug</i> | Khakassia | GF_N2_FC76_2021_Khak          | 4 / 2 | 0.01 | 0.98 | 0.00 | 0.00 | II  | 0.00 | 0.84 | 0.11 | 0.05 |
| 33 | <i>F. cherrug</i> | Khakassia | GF_CA30_FC77_2021_Khak        | 4 / 2 | 0.01 | 0.99 | 0.00 | 0.00 | II  | 0.00 | 1.00 | 0.00 | 0.00 |
| 34 | <i>F. cherrug</i> | Khakassia | GF_CA31_FC78_2021_Khak        | 4 / 2 | 0.02 | 0.97 | 0.00 | 0.01 | II  | 0.00 | 0.91 | 0.08 | 0.01 |
| 35 | <i>F. cherrug</i> | Khakassia | GF_CA32_FC79_2021_Khak        | 4 / 2 | 0.01 | 0.98 | 0.00 | 0.01 | II  | 0.00 | 1.00 | 0.00 | 0.00 |
| 36 | <i>F. cherrug</i> | Khakassia | GF_CA33_FC80_2021_Khak        | 4 / 2 | 0.02 | 0.98 | 0.00 | 0.00 | II  | 0.00 | 1.00 | 0.00 | 0.00 |
| 37 | <i>F. cherrug</i> | Khakassia | GF_CA34_FC81_2021_Khak        | 4 / 2 | 0.01 | 0.99 | 0.00 | 0.00 | II  | 0.00 | 1.00 | 0.00 | 0.00 |
| 38 | <i>F. cherrug</i> | Khakassia | GF_D459_FC82_2021_Khak*       | 4 / 2 | 0.24 | 0.59 | 0.01 | 0.16 | II  | 0.00 | 1.00 | 0.00 | 0.00 |
| 39 | <i>F. cherrug</i> | Khakassia | GF_D460_FC83_2021_Khak        | 4 / 2 | 0.01 | 0.98 | 0.00 | 0.01 | II  | 0.00 | 0.99 | 0.01 | 0.00 |
| 40 | <i>F. cherrug</i> | Khakassia | GF_CA26_FC84_2021_Khak        | 4 / 2 | 0.02 | 0.97 | 0.00 | 0.01 | II  | 0.00 | 0.99 | 0.01 | 0.00 |
| 41 | <i>F. cherrug</i> | Tuva      | ACF_O-P057_2017_Tuva          | 3 / 3 | 0.93 | 0.01 | 0.06 | 0.01 | IV  | 0.01 | 0.00 | 0.04 | 0.95 |
| 42 | <i>F. cherrug</i> | Tuva      | GF_D002_40B_2018_Tuva         | 3 / 3 | 0.98 | 0.01 | 0.01 | 0.01 | IV  | 0.00 | 0.00 | 0.00 | 1.00 |
| 43 | <i>F. cherrug</i> | Tuva      | GF_D416_2017_Tuva             | 3 / 3 | 0.98 | 0.01 | 0.01 | 0.01 | II  | 0.00 | 0.97 | 0.02 | 0.02 |
| 44 | <i>F. cherrug</i> | Tuva      | GF_D417_2017_Tuva             | 3 / 3 | 0.98 | 0.01 | 0.01 | 0.00 | II  | 0.00 | 1.00 | 0.00 | 0.00 |
| 45 | <i>F. cherrug</i> | Tuva      | GF_D418_2017_Tuva             | 3 / 3 | 0.97 | 0.01 | 0.01 | 0.01 | II  | 0.00 | 0.90 | 0.02 | 0.08 |
| 46 | <i>F. cherrug</i> | Tuva      | GF_D450_2017_Tuva             | 3 / 3 | 0.98 | 0.01 | 0.01 | 0.01 | II  | 0.00 | 0.91 | 0.09 | 0.00 |
| 47 | <i>F. cherrug</i> | Tuva      | GF_D468_FC85_2021_Tuva        | 3 / 3 | 0.96 | 0.01 | 0.03 | 0.01 | III | 0.00 | 0.20 | 0.79 | 0.00 |
| 48 | <i>F. cherrug</i> | Tuva      | GF_D469_FC86_2021_Tuva        | 3 / 3 | 0.95 | 0.01 | 0.03 | 0.01 | III | 0.00 | 0.73 | 0.23 | 0.04 |
| 49 | <i>F. cherrug</i> | Tuva      | GF_D470_FC87_2021_Tuva        | 3 / 3 | 0.97 | 0.01 | 0.02 | 0.01 | III | 0.00 | 0.20 | 0.79 | 0.01 |
| 50 | <i>F. cherrug</i> | Tuva      | GF_D438_FC56_2021_Tuva        | 3 / 3 | 0.97 | 0.00 | 0.01 | 0.01 | III | 0.00 | 0.00 | 0.89 | 0.11 |
| 51 | <i>F. cherrug</i> | Tuva      | GF_D439_FC57_2021_Tuva        | 3 / 3 | 0.92 | 0.01 | 0.06 | 0.01 | IV  | 0.00 | 0.10 | 0.04 | 0.86 |
| 52 | <i>F. cherrug</i> | Tuva      | GF_D196_61B_2018_Tuva         | 3 / 3 | 0.96 | 0.01 | 0.03 | 0.01 | IV  | 0.00 | 0.00 | 0.00 | 1.00 |
| 53 | <i>F. cherrug</i> | Tuva      | GF_C883_62B_2018_Tuva         | 3 / 3 | 0.97 | 0.01 | 0.01 | 0.01 | IV  | 0.00 | 0.19 | 0.01 | 0.80 |
| 54 | <i>F. cherrug</i> | Tuva      | GF_D020_18B_2018_Tuva         | 3 / 3 | 0.97 | 0.01 | 0.01 | 0.00 | III | 0.00 | 0.00 | 1.00 | 0.00 |
| 55 | <i>F. cherrug</i> | Tuva      | GF_D023_21B_2018_Tuva         | 3 / 3 | 0.97 | 0.01 | 0.01 | 0.01 | III | 0.00 | 0.00 | 1.00 | 0.00 |
| 56 | <i>F. cherrug</i> | Tuva      | GF_D433_FC51_2021_Tuva        | 3 / 3 | 0.95 | 0.02 | 0.02 | 0.01 | II  | 0.00 | 1.00 | 0.00 | 0.00 |
| 57 | <i>F. cherrug</i> | Tuva      | GF_D434_FC52_2021_Tuva        | 3 / 3 | 0.96 | 0.02 | 0.02 | 0.01 | IV  | 0.00 | 0.08 | 0.00 | 0.92 |
| 58 | <i>F. cherrug</i> | Tuva      | GF_D435_FC53_2021_Tuva        | 3 / 3 | 0.95 | 0.02 | 0.02 | 0.01 | IV  | 0.01 | 0.00 | 0.00 | 0.99 |
| 59 | <i>F. cherrug</i> | Tuva      | GF_D430_FC50_2021_Tuva        | 3 / 3 | 0.96 | 0.01 | 0.03 | 0.01 | IV  | 0.00 | 0.01 | 0.00 | 0.99 |
| 60 | <i>F. cherrug</i> | Tuva      | GF_D436_FC54_2021_Tuva        | 3 / 3 | 0.95 | 0.02 | 0.02 | 0.01 | II  | 0.00 | 1.00 | 0.00 | 0.00 |
| 61 | <i>F. cherrug</i> | Tuva      | GF_D397_FC60_2021_Tuva        | 3 / 3 | 0.97 | 0.01 | 0.02 | 0.01 | IV  | 0.00 | 0.11 | 0.04 | 0.85 |
| 62 | <i>F. cherrug</i> | Tuva      | GF_D396_FC59_2021_Tuva        | 3 / 3 | 0.98 | 0.01 | 0.01 | 0.00 | IV  | 0.00 | 0.08 | 0.02 | 0.90 |

|     |                   |      |                        |       |      |      |      |      |     |      |      |      |      |
|-----|-------------------|------|------------------------|-------|------|------|------|------|-----|------|------|------|------|
| 63  | <i>F. cherrug</i> | Tuva | GF_D398_FC61_2021_Tuva | 3 / 3 | 0.92 | 0.01 | 0.06 | 0.01 | II  | 0.00 | 0.99 | 0.00 | 0.00 |
| 64  | <i>F. cherrug</i> | Tuva | GF_CA70_FC62_2021_Tuva | 3 / 3 | 0.96 | 0.01 | 0.03 | 0.01 | II  | 0.00 | 0.99 | 0.00 | 0.01 |
| 65  | <i>F. cherrug</i> | Tuva | GF_D429_FC21-10_Tuva   | 3 / 3 | 0.97 | 0.01 | 0.02 | 0.01 | III | 0.00 | 0.03 | 0.92 | 0.04 |
| 66  | <i>F. cherrug</i> | Tuva | GF_D428_FC21-9_Tuva    | 3 / 3 | 0.97 | 0.01 | 0.02 | 0.00 | III | 0.00 | 0.00 | 0.96 | 0.04 |
| 67  | <i>F. cherrug</i> | Tuva | GF_D222_FC21-12_Tuva   | 3 / 3 | 0.97 | 0.01 | 0.01 | 0.01 | III | 0.00 | 0.00 | 1.00 | 0.00 |
| 68  | <i>F. cherrug</i> | Tuva | GF_D223_FC21-13_Tuva   | 3 / 3 | 0.97 | 0.01 | 0.01 | 0.00 | III | 0.00 | 0.04 | 0.87 | 0.09 |
| 69  | <i>F. cherrug</i> | Tuva | GF_D227_FC21-14_Tuva   | 3 / 3 | 0.97 | 0.01 | 0.02 | 0.01 | IV  | 0.00 | 0.00 | 0.11 | 0.89 |
| 70  | <i>F. cherrug</i> | Tuva | GF_CA22_FC21-11_Tuva   | 3 / 3 | 0.96 | 0.02 | 0.01 | 0.01 | III | 0.00 | 0.07 | 0.90 | 0.03 |
| 71  | <i>F. cherrug</i> | Tuva | GF_CA69_FC47_2021_Tuva | 3 / 3 | 0.96 | 0.01 | 0.03 | 0.00 | IV  | 0.00 | 0.00 | 0.17 | 0.83 |
| 72  | <i>F. cherrug</i> | Tuva | GF_D394_FC48_2021_Tuva | 3 / 3 | 0.97 | 0.01 | 0.02 | 0.01 | III | 0.00 | 0.00 | 0.32 | 0.68 |
| 73  | <i>F. cherrug</i> | Tuva | GF_D395_FC49_2021_Tuva | 3 / 3 | 0.97 | 0.01 | 0.02 | 0.00 | IV  | 0.00 | 0.00 | 0.05 | 0.95 |
| 74  | <i>F. cherrug</i> | Tuva | GF_D420_FC21-5_Tuva    | 3 / 3 | 0.93 | 0.01 | 0.06 | 0.01 | IV  | 0.00 | 0.00 | 0.00 | 1.00 |
| 75  | <i>F. cherrug</i> | Tuva | GF_D421_FC21-6_Tuva    | 3 / 3 | 0.94 | 0.01 | 0.04 | 0.01 | IV  | 0.01 | 0.00 | 0.03 | 0.96 |
| 76  | <i>F. cherrug</i> | Tuva | GF_D427_FC21-7_Tuva    | 3 / 3 | 0.95 | 0.02 | 0.03 | 0.01 | IV  | 0.00 | 0.00 | 0.00 | 1.00 |
| 77  | <i>F. cherrug</i> | Tuva | GF_D426_FC21-8_Tuva    | 3 / 3 | 0.95 | 0.01 | 0.02 | 0.02 | IV  | 0.00 | 0.00 | 0.00 | 1.00 |
| 78  | <i>F. cherrug</i> | Tuva | GF_D480_FC65_2021_Tuva | 3 / 3 | 0.96 | 0.01 | 0.02 | 0.01 | III | 0.00 | 0.00 | 1.00 | 0.00 |
| 79  | <i>F. cherrug</i> | Tuva | GF_D481_FC66_2021_Tuva | 3 / 3 | 0.98 | 0.01 | 0.01 | 0.01 | IV  | 0.00 | 0.08 | 0.03 | 0.89 |
| 80  | <i>F. cherrug</i> | Tuva | GF_D040_36B_2018_Tuva  | 3 / 3 | 0.97 | 0.01 | 0.01 | 0.01 | III | 0.00 | 0.06 | 0.91 | 0.03 |
| 81  | <i>F. cherrug</i> | Tuva | GF_D041_39B_2018_Tuva  | 3 / 3 | 0.98 | 0.01 | 0.01 | 0.01 | III | 0.00 | 0.08 | 0.91 | 0.00 |
| 82  | <i>F. cherrug</i> | Tuva | GF_D042_37B_2018_Tuva  | 3 / 3 | 0.96 | 0.01 | 0.02 | 0.01 | IV  | 0.00 | 0.00 | 0.00 | 1.00 |
| 83  | <i>F. cherrug</i> | Tuva | GF_D035_27B_2018_Tuva  | 3 / 3 | 0.97 | 0.01 | 0.01 | 0.01 | III | 0.00 | 0.28 | 0.71 | 0.00 |
| 84  | <i>F. cherrug</i> | Tuva | GF_D210_FC38_2021_Tuva | 3 / 3 | 0.97 | 0.01 | 0.01 | 0.01 | IV  | 0.00 | 0.00 | 0.00 | 1.00 |
| 85  | <i>F. cherrug</i> | Tuva | GF_CA65_FC37_2021_Tuva | 3 / 3 | 0.97 | 0.01 | 0.01 | 0.01 | II  | 0.00 | 0.98 | 0.01 | 0.02 |
| 86  | <i>F. cherrug</i> | Tuva | GF_D004_2B_2018_Tuva   | 3 / 3 | 0.97 | 0.01 | 0.01 | 0.01 | III | 0.00 | 0.00 | 1.00 | 0.00 |
| 87  | <i>F. cherrug</i> | Tuva | GF_D010_3B_2018_Tuva   | 3 / 3 | 0.98 | 0.01 | 0.01 | 0.01 | III | 0.00 | 0.00 | 1.00 | 0.00 |
| 88  | <i>F. cherrug</i> | Tuva | GF_D001_1B_2018_Tuva   | 3 / 3 | 0.96 | 0.02 | 0.02 | 0.01 | II  | 0.00 | 1.00 | 0.00 | 0.00 |
| 89  | <i>F. cherrug</i> | Tuva | GF_D013_48B_2018_Tuva  | 3 / 3 | 0.95 | 0.01 | 0.03 | 0.00 | IV  | 0.00 | 0.00 | 0.00 | 1.00 |
| 90  | <i>F. cherrug</i> | Tuva | GF_D014_49B_2018_Tuva  | 3 / 3 | 0.90 | 0.01 | 0.08 | 0.00 | IV  | 0.00 | 0.01 | 0.00 | 0.99 |
| 91  | <i>F. cherrug</i> | Tuva | GF_D024_43B_2018_Tuva  | 3 / 3 | 0.93 | 0.02 | 0.04 | 0.01 | II  | 0.00 | 0.96 | 0.00 | 0.04 |
| 92  | <i>F. cherrug</i> | Tuva | GF_D017_51B_2018_Tuva  | 3 / 3 | 0.93 | 0.03 | 0.04 | 0.01 | II  | 0.00 | 0.99 | 0.01 | 0.00 |
| 93  | <i>F. cherrug</i> | Tuva | GF_D180_54B_2018_Tuva  | 3 / 3 | 0.97 | 0.01 | 0.01 | 0.01 | IV  | 0.00 | 0.48 | 0.02 | 0.50 |
| 94  | <i>F. cherrug</i> | Tuva | GF_D019_53B_2018_Tuva  | 3 / 3 | 0.95 | 0.01 | 0.03 | 0.01 | II  | 0.00 | 0.73 | 0.25 | 0.02 |
| 95  | <i>F. cherrug</i> | Tuva | GF_D029_14B_2018_Tuva  | 3 / 3 | 0.98 | 0.01 | 0.01 | 0.01 | II  | 0.00 | 0.74 | 0.16 | 0.10 |
| 96  | <i>F. cherrug</i> | Tuva | GF_D028_13B_2018_Tuva  | 3 / 3 | 0.97 | 0.01 | 0.01 | 0.01 | II  | 0.00 | 0.99 | 0.01 | 0.00 |
| 97  | <i>F. cherrug</i> | Tuva | GF_CA68_FC43_2021_Tuva | 3 / 3 | 0.98 | 0.00 | 0.01 | 0.01 | III | 0.00 | 0.00 | 1.00 | 0.00 |
| 98  | <i>F. cherrug</i> | Tuva | GF_D391_FC44_2021_Tuva | 3 / 3 | 0.98 | 0.01 | 0.01 | 0.01 | III | 0.00 | 0.00 | 1.00 | 0.00 |
| 99  | <i>F. cherrug</i> | Tuva | GF_D393_FC46_2021_Tuva | 3 / 3 | 0.98 | 0.00 | 0.01 | 0.01 | III | 0.00 | 0.01 | 0.99 | 0.00 |
| 100 | <i>F. cherrug</i> | Tuva | GF_D392_FC45_2021_Tuva | 3 / 3 | 0.97 | 0.01 | 0.01 | 0.02 | II  | 0.00 | 0.90 | 0.10 | 0.00 |
| 101 | <i>F. cherrug</i> | Tuva | GF_D386_FC63_2021_Tuva | 3 / 3 | 0.91 | 0.01 | 0.08 | 0.01 | IV  | 0.00 | 0.07 | 0.00 | 0.93 |
| 102 | <i>F. cherrug</i> | Tuva | GF_CA71_FC64_2021_Tuva | 3 / 3 | 0.91 | 0.01 | 0.08 | 0.01 | IV  | 0.01 | 0.04 | 0.00 | 0.95 |

|     |                   |      |                                |       |      |      |      |      |     |      |      |      |      |
|-----|-------------------|------|--------------------------------|-------|------|------|------|------|-----|------|------|------|------|
| 103 | <i>F. cherrug</i> | Tuva | GF_CA64_FC33_2021_Tuva         | 3 / 3 | 0.95 | 0.01 | 0.03 | 0.01 | III | 0.01 | 0.20 | 0.57 | 0.22 |
| 104 | <i>F. cherrug</i> | Tuva | GF_D408_FC34_2021_Tuva         | 3 / 3 | 0.95 | 0.01 | 0.03 | 0.00 | IV  | 0.00 | 0.00 | 0.00 | 1.00 |
| 105 | <i>F. cherrug</i> | Tuva | GF_D409_FC35_2021_Tuva         | 3 / 3 | 0.97 | 0.01 | 0.02 | 0.01 | IV  | 0.00 | 0.05 | 0.01 | 0.95 |
| 106 | <i>F. cherrug</i> | Tuva | GF_D413_FC36_2021_Tuva         | 3 / 3 | 0.95 | 0.01 | 0.04 | 0.01 | III | 0.00 | 0.26 | 0.58 | 0.16 |
| 107 | <i>F. cherrug</i> | Tuva | GF_D406_2017_Tuva              | 3 / 3 | 0.97 | 0.01 | 0.01 | 0.01 | II  | 0.00 | 0.96 | 0.02 | 0.02 |
| 108 | <i>F. cherrug</i> | Tuva | GF_D403_2017_Tuva              | 3 / 3 | 0.96 | 0.01 | 0.02 | 0.01 | III | 0.00 | 0.00 | 0.93 | 0.06 |
| 109 | <i>F. cherrug</i> | Tuva | GF_D408_2017_Tuva              | 3 / 3 | 0.97 | 0.01 | 0.01 | 0.01 | II  | 0.00 | 0.96 | 0.02 | 0.02 |
| 110 | <i>F. cherrug</i> | Tuva | GF_D410_2017_Tuva              | 3 / 3 | 0.96 | 0.02 | 0.01 | 0.01 | II  | 0.00 | 0.41 | 0.01 | 0.58 |
| 111 | <i>F. cherrug</i> | Tuva | GF_D045_9B_2018_Tuva           | 3 / 3 | 0.94 | 0.01 | 0.05 | 0.01 | II  | 0.00 | 0.94 | 0.00 | 0.06 |
| 112 | <i>F. cherrug</i> | Tuva | GF_D047_11B_2018_Tuva          | 3 / 3 | 0.96 | 0.00 | 0.03 | 0.01 | II  | 0.00 | 0.89 | 0.01 | 0.10 |
| 113 | <i>F. cherrug</i> | Tuva | GF_CA60_FC27_2021_Tuva         | 3 / 3 | 0.88 | 0.01 | 0.10 | 0.01 | III | 0.00 | 0.00 | 1.00 | 0.00 |
| 114 | <i>F. cherrug</i> | Tuva | GF_CA61_FC28_2021_Tuva         | 3 / 3 | 0.84 | 0.01 | 0.14 | 0.01 | I   | 0.78 | 0.00 | 0.00 | 0.22 |
| 115 | <i>F. cherrug</i> | Tuva | GF_D284_FC29_2021_Tuva         | 3 / 3 | 0.93 | 0.01 | 0.05 | 0.01 | III | 0.00 | 0.27 | 0.73 | 0.00 |
| 116 | <i>F. cherrug</i> | Tuva | GF_D228_FC21-15_Tuva           | 3 / 3 | 0.90 | 0.02 | 0.07 | 0.01 | II  | 0.03 | 0.61 | 0.00 | 0.36 |
| 117 | <i>F. cherrug</i> | Tuva | GF_D229_FC21-16_Tuva           | 3 / 3 | 0.97 | 0.00 | 0.02 | 0.01 | IV  | 0.00 | 0.00 | 0.00 | 1.00 |
| 118 | <i>F. cherrug</i> | Tuva | GF_D422_FC21-1_Tuva            | 3 / 3 | 0.96 | 0.01 | 0.03 | 0.01 | III | 0.00 | 0.00 | 1.00 | 0.00 |
| 119 | <i>F. cherrug</i> | Tuva | GF_D423_FC21-2_Tuva            | 3 / 3 | 0.93 | 0.01 | 0.06 | 0.00 | III | 0.03 | 0.00 | 0.86 | 0.11 |
| 120 | <i>F. cherrug</i> | Tuva | GF_D424_FC21-3_Tuva            | 3 / 3 | 0.97 | 0.01 | 0.01 | 0.01 | III | 0.00 | 0.01 | 0.94 | 0.05 |
| 121 | <i>F. cherrug</i> | Tuva | GF_D425_FC21-4_Tuva            | 3 / 3 | 0.96 | 0.01 | 0.02 | 0.01 | III | 0.00 | 0.00 | 1.00 | 0.00 |
| 122 | <i>F. cherrug</i> | Tuva | GF_D025_32B_2018_Tuva          | 3 / 3 | 0.97 | 0.01 | 0.01 | 0.01 | III | 0.00 | 0.00 | 0.86 | 0.14 |
| 123 | <i>F. cherrug</i> | Tuva | GF_D027_26B_2018_Tuva          | 3 / 3 | 0.95 | 0.03 | 0.01 | 0.01 | III | 0.00 | 0.00 | 0.88 | 0.12 |
| 124 | <i>F. cherrug</i> | Tuva | GF_CA66_FC40_2021_Tuva         | 3 / 3 | 0.95 | 0.01 | 0.03 | 0.01 | IV  | 0.01 | 0.01 | 0.04 | 0.94 |
| 125 | <i>F. cherrug</i> | Tuva | GF_CA67_FC41_2021_Tuva         | 3 / 3 | 0.96 | 0.01 | 0.03 | 0.01 | IV  | 0.00 | 0.03 | 0.09 | 0.89 |
| 126 | <i>F. cherrug</i> | Tuva | GF_D379_FC42_2021_Tuva         | 3 / 3 | 0.96 | 0.02 | 0.02 | 0.01 | II  | 0.00 | 0.79 | 0.03 | 0.18 |
| 127 | <i>F. cherrug</i> | Tuva | GF_D378_FC39_2021_Tuva         | 3 / 3 | 0.96 | 0.02 | 0.02 | 0.01 | IV  | 0.00 | 0.03 | 0.03 | 0.94 |
| 128 | <i>F. cherrug</i> | Tuva | GF_CA62_FC30_2021_Tuva         | 3 / 3 | 0.98 | 0.01 | 0.01 | 0.01 | III | 0.00 | 0.00 | 1.00 | 0.00 |
| 129 | <i>F. cherrug</i> | Tuva | GF_CA63_FC31_2021_Tuva         | 3 / 3 | 0.98 | 0.01 | 0.01 | 0.00 | III | 0.00 | 0.00 | 1.00 | 0.00 |
| 130 | <i>F. cherrug</i> | Tuva | GF_D242_FC32_2021_Tuva         | 3 / 3 | 0.96 | 0.01 | 0.01 | 0.02 | III | 0.00 | 0.02 | 0.98 | 0.00 |
| 131 | <i>F. cherrug</i> | Tuva | GF_TUV-16_2017_Tuva            | 3 / 3 | 0.96 | 0.01 | 0.02 | 0.01 | II  | 0.00 | 0.67 | 0.00 | 0.33 |
| 132 | <i>F. cherrug</i> | Tuva | GF_D401_2017_Tuva              | 3 / 3 | 0.97 | 0.01 | 0.01 | 0.01 | II  | 0.00 | 0.99 | 0.00 | 0.01 |
| 133 | <i>F. cherrug</i> | Tuva | GF_D407_2017_Tuva              | 3 / 3 | 0.97 | 0.01 | 0.01 | 0.01 | II  | 0.00 | 0.99 | 0.00 | 0.01 |
| 134 | <i>F. cherrug</i> | Tuva | GF_D413_2017_Tuva              | 3 / 3 | 0.98 | 0.01 | 0.01 | 0.00 | IV  | 0.00 | 0.09 | 0.02 | 0.89 |
| 135 | <i>F. cherrug</i> | Tuva | GF_D172_172B_2018_Tuva         | 3 / 3 | 0.95 | 0.01 | 0.03 | 0.01 | III | 0.00 | 0.00 | 1.00 | 0.00 |
| 136 | <i>F. cherrug</i> | Tuva | MF_87-FC_FC-RT290-1_2014_Tuva  | 3 / 3 | 0.98 | 0.00 | 0.01 | 0.01 | III | 0.00 | 0.02 | 0.91 | 0.08 |
| 137 | <i>F. cherrug</i> | Tuva | MF_A45-MK_FC-RT287-1_2014_Tuva | 3 / 3 | 0.94 | 0.02 | 0.04 | 0.01 | III | 0.00 | 0.01 | 0.90 | 0.09 |
| 138 | <i>F. cherrug</i> | Tuva | MF_FC097_FC-RT5-2_2010_Tuva    | 3 / 3 | 0.95 | 0.01 | 0.04 | 0.01 | IV  | 0.00 | 0.04 | 0.01 | 0.95 |
| 139 | <i>F. cherrug</i> | Tuva | MF_FC10_FC-RT188-1_2006_Tuva   | 3 / 3 | 0.96 | 0.02 | 0.01 | 0.01 | II  | 0.00 | 0.49 | 0.51 | 0.00 |
| 140 | <i>F. cherrug</i> | Tuva | MF_FC23_FC-RT183-2_2005_Tuva   | 3 / 3 | 0.89 | 0.01 | 0.09 | 0.02 | II  | 0.00 | 0.98 | 0.01 | 0.02 |
| 141 | <i>F. cherrug</i> | Tuva | MF_FC29_FC-RT39-1_2010_Tuva    | 3 / 3 | 0.96 | 0.01 | 0.02 | 0.02 | III | 0.00 | 0.00 | 0.98 | 0.02 |
| 142 | <i>F. cherrug</i> | Tuva | MF_FC39A_FC-RT231-2_2010_Tuva  | 3 / 3 | 0.97 | 0.01 | 0.02 | 0.01 | III | 0.00 | 0.00 | 1.00 | 0.00 |

|     |                      |          |                                    |       |      |      |      |      |     |      |      |      |      |
|-----|----------------------|----------|------------------------------------|-------|------|------|------|------|-----|------|------|------|------|
| 143 | <i>F. cherrug</i>    | Tuva     | MF_FC39A_FC-RT231-2_2014_Tuva      | 3 / 3 | 0.97 | 0.01 | 0.02 | 0.01 | IV  | 0.00 | 0.01 | 0.04 | 0.95 |
| 144 | <i>F. cherrug</i>    | Tuva     | MF_FC7_FC-RT169-1_2010_Tuva        | 3 / 3 | 0.95 | 0.01 | 0.02 | 0.01 | III | 0.00 | 0.01 | 0.94 | 0.05 |
| 145 | <i>F. cherrug</i>    | Tuva     | MF_FC-J06_FC-RT242-1_2008_Tuva     | 3 / 3 | 0.96 | 0.01 | 0.03 | 0.01 | IV  | 0.00 | 0.31 | 0.02 | 0.67 |
| 146 | <i>F. cherrug</i>    | Tuva     | MF_FC-L1_FC-RT275-1_2011_Tuva      | 3 / 3 | 0.91 | 0.01 | 0.05 | 0.03 | II  | 0.00 | 0.93 | 0.01 | 0.06 |
| 147 | <i>F. cherrug</i>    | Tuva     | MF_FC6_FC-RT18-1_2008_Tuva         | 3 / 3 | 0.96 | 0.01 | 0.02 | 0.01 | IV  | 0.00 | 0.67 | 0.02 | 0.30 |
| 148 | <i>F. cherrug</i>    | Tuva     | MF_FC-A3_FC-RT226-1_2006_Tuva      | 3 / 3 | 0.91 | 0.03 | 0.05 | 0.01 | III | 0.01 | 0.02 | 0.89 | 0.08 |
| 149 | <i>F. cherrug</i>    | Tuva     | MF_FC11_FC-RT10-2_2005_Tuva        | 3 / 3 | 0.98 | 0.00 | 0.01 | 0.01 | IV  | 0.00 | 0.02 | 0.21 | 0.77 |
| 150 | <i>F. cherrug</i>    | Tuva     | MF_FC19_FC-RT12-2_2006_Tuva        | 3 / 3 | 0.96 | 0.01 | 0.02 | 0.01 | IV  | 0.00 | 0.00 | 0.00 | 1.00 |
| 151 | <i>F. cherrug</i>    | Tuva     | MF_FC22A_FC-RT151-2_2005_Tuva      | 3 / 3 | 0.97 | 0.01 | 0.01 | 0.01 | II  | 0.00 | 1.00 | 0.00 | 0.00 |
| 152 | <i>F. cherrug</i>    | Tuva     | MF_BH11A_FC-RT153-1_2014_Tuva      | 3 / 3 | 0.83 | 0.01 | 0.14 | 0.03 | I   | 0.23 | 0.04 | 0.26 | 0.47 |
| 153 | <i>F. cherrug</i>    | Tuva     | MF_FC10_FC-RT188-1_2010_Tuva       | 3 / 3 | 0.98 | 0.00 | 0.01 | 0.01 | III | 0.00 | 0.00 | 1.00 | 0.00 |
| 154 | <i>F. cherrug</i>    | Tuva     | MF_FC8_FC-RT202-1_2011_Tuva        | 3 / 3 | 0.97 | 0.01 | 0.02 | 0.01 | IV  | 0.00 | 0.02 | 0.06 | 0.92 |
| 155 | <i>F. cherrug</i>    | Tuva     | MF_FCT3_FC-RT204-2_2010_Tuva       | 3 / 3 | 0.95 | 0.01 | 0.04 | 0.01 | IV  | 0.01 | 0.00 | 0.12 | 0.87 |
| 156 | <i>F. cherrug</i>    | Tuva     | MF_A35-MK_FC-RT288-1_2014_Tuva     | 3 / 3 | 0.93 | 0.04 | 0.02 | 0.02 | III | 0.00 | 0.00 | 0.99 | 0.01 |
| 157 | <i>F. cherrug</i>    | Tuva     | MF_TUV-14_FC-RT289_2014_Tuva       | 3 / 3 | 0.95 | 0.01 | 0.04 | 0.01 | III | 0.00 | 0.00 | 0.83 | 0.17 |
| 158 | <i>F. cherrug</i>    | Tuva     | MF_FC28_FC-RT38-1_2010_Tuva        | 3 / 3 | 0.94 | 0.01 | 0.02 | 0.03 | II  | 0.00 | 0.98 | 0.01 | 0.01 |
| 159 | <i>F. cherrug</i>    | Tuva     | MF_FC30_FC-RT40-1_2008_Tuva        | 3 / 3 | 0.97 | 0.01 | 0.02 | 0.01 | III | 0.00 | 0.07 | 0.93 | 0.00 |
| 160 | <i>F. cherrug</i>    | Tuva     | MF_FC35A_FC-RT54-4_2005_Tuva       | 3 / 3 | 0.96 | 0.01 | 0.03 | 0.01 | II  | 0.00 | 0.97 | 0.01 | 0.02 |
| 161 | <i>F. cherrug</i>    | Tuva     | MF_FC098_12062005_Tuva             | 3 / 3 | 0.93 | 0.01 | 0.04 | 0.02 | II  | 0.00 | 1.00 | 0.00 | 0.00 |
| 162 | <i>F. cherrug</i>    | Tuva     | MF_FC10_27062011_Tuva              | 3 / 3 | 0.92 | 0.02 | 0.05 | 0.01 | II  | 0.00 | 0.78 | 0.00 | 0.22 |
| 163 | <i>F. cherrug</i>    | Tuva     | MF_FC16A_18062006_Tuva             | 3 / 3 | 0.92 | 0.01 | 0.04 | 0.02 | IV  | 0.00 | 0.00 | 0.04 | 0.96 |
| 164 | <i>F. cherrug</i>    | Tuva     | MF_FCJ14_21062008_Tuva             | 3 / 3 | 0.88 | 0.06 | 0.03 | 0.03 | III | 0.00 | 0.29 | 0.70 | 0.00 |
| 165 | <i>F. cherrug</i>    | Tuva     | MF_Saigyn_01062010_Tuva            | 3 / 3 | 0.92 | 0.02 | 0.03 | 0.03 | II  | 0.00 | 0.86 | 0.14 | 0.00 |
| 166 | <i>F. cherrug</i>    | Dauria   | MF_FC3_FC-ZK5-1_2010_Dauria        | 6 / 2 | 0.46 | 0.05 | 0.04 | 0.45 | III | 0.00 | 0.00 | 1.00 | 0.00 |
| 167 | <i>F. cherrug</i>    | Dauria   | MF_L-T2_28072010_Dauria            | 6 / 2 | 0.41 | 0.07 | 0.03 | 0.48 | II  | 0.00 | 0.91 | 0.09 | 0.00 |
| 168 | <i>F. cherrug</i>    | Dauria   | MS_MO58_R-110648_1988_Dauria       | 6 / 2 | 0.43 | 0.03 | 0.07 | 0.47 | III | 0.00 | 0.03 | 0.97 | 0.00 |
| 169 | <i>F. rusticolus</i> | Far East | MS_FR_R21515_Menzbier_Kamchatka    | 7 / 4 | 0.04 | 0.01 | 0.93 | 0.03 | I   | 1.00 | 0.00 | 0.00 | 0.00 |
| 170 | <i>F. rusticolus</i> | Far East | MS_FR_R95275_Dementiev_Komandorski | 7 / 4 | 0.03 | 0.00 | 0.95 | 0.02 | I   | 1.00 | 0.00 | 0.00 | 0.00 |
| 171 | <i>F. rusticolus</i> | Far East | MS_FR_R95278_1933_Koryakia         | 7 / 4 | 0.03 | 0.01 | 0.95 | 0.02 | IV  | 0.02 | 0.08 | 0.00 | 0.90 |
| 172 | <i>F. rusticolus</i> | Far East | MS_FR_R95268_1941_Kamchatka        | 7 / 4 | 0.02 | 0.00 | 0.96 | 0.02 | I   | 0.57 | 0.00 | 0.00 | 0.43 |
| 173 | <i>F. rusticolus</i> | Far East | MS_FR_R95272_1945_Kamchatka        | 7 / 4 | 0.03 | 0.00 | 0.93 | 0.03 | I   | 1.00 | 0.00 | 0.00 | 0.00 |
| 174 | <i>F. rusticolus</i> | Far East | MS_FR_R72620_1949_Kamchatka        | 7 / 4 | 0.03 | 0.00 | 0.95 | 0.02 | I   | 0.99 | 0.00 | 0.00 | 0.01 |
| 175 | <i>F. rusticolus</i> | Far East | MS_FR_R95270_1950_Kamchatka        | 7 / 4 | 0.03 | 0.01 | 0.93 | 0.03 | IV  | 0.04 | 0.00 | 0.00 | 0.96 |
| 176 | <i>F. rusticolus</i> | Far East | MS_FR_R95267_1951_Kamchatka        | 7 / 4 | 0.03 | 0.01 | 0.95 | 0.02 | I   | 1.00 | 0.00 | 0.00 | 0.00 |
| 177 | <i>F. rusticolus</i> | Far East | MS_FR_R97559_1973_Kamchatka        | 7 / 4 | 0.02 | 0.01 | 0.95 | 0.02 | I   | 1.00 | 0.00 | 0.00 | 0.00 |
| 178 | <i>F. rusticolus</i> | Far East | MS_FR_R97560_1973_Kamchatka        | 7 / 4 | 0.02 | 0.01 | 0.95 | 0.02 | IV  | 0.00 | 0.00 | 0.00 | 1.00 |
| 179 | <i>F. rusticolus</i> | Far East | MS_FR_R132286_2006_Chukotka        | 8 / 4 | 0.02 | 0.01 | 0.96 | 0.01 | III | 0.01 | 0.03 | 0.12 | 0.84 |
| 180 | <i>F. rusticolus</i> | Far East | MS_FR_R127174_2009_Kamchatka       | 8 / 4 | 0.01 | 0.01 | 0.98 | 0.01 | I   | 1.00 | 0.00 | 0.00 | 0.00 |
| 181 | <i>F. rusticolus</i> | Far East | MS_FR_R127175_2009_Kamchatka       | 8 / 4 | 0.01 | 0.01 | 0.98 | 0.01 | I   | 0.99 | 0.00 | 0.00 | 0.01 |
| 182 | <i>F. rusticolus</i> | Far East | MS_FR_R133255_2014_Chukotka        | 8 / 4 | 0.01 | 0.01 | 0.98 | 0.01 | IV  | 0.00 | 0.00 | 0.00 | 1.00 |

|     |                      |          |                                |       |      |      |      |      |   |      |      |      |      |
|-----|----------------------|----------|--------------------------------|-------|------|------|------|------|---|------|------|------|------|
| 183 | <i>F. rusticolus</i> | Far East | ACF_12-KAM-19_2019_Kamchatka   | 8 / 4 | 0.01 | 0.01 | 0.97 | 0.01 | I | 1.00 | 0.00 | 0.00 | 0.00 |
| 184 | <i>F. rusticolus</i> | Far East | ACF_13-KAM-19_2019_Kamchatka   | 8 / 4 | 0.01 | 0.01 | 0.98 | 0.01 | I | 0.67 | 0.00 | 0.10 | 0.23 |
| 185 | <i>F. rusticolus</i> | Far East | ACF_14-KAM-19_2019_Kamchatka   | 8 / 4 | 0.02 | 0.02 | 0.95 | 0.01 | I | 0.62 | 0.03 | 0.03 | 0.32 |
| 186 | <i>F. rusticolus</i> | Far East | ACF_6-KAM-19_2019_Kamchatka    | 8 / 4 | 0.01 | 0.01 | 0.98 | 0.01 | I | 1.00 | 0.00 | 0.00 | 0.00 |
| 187 | <i>F. rusticolus</i> | Far East | CF_Chuk_N1_2019_Chukotka       | 8 / 4 | 0.01 | 0.01 | 0.99 | 0.00 | I | 1.00 | 0.00 | 0.00 | 0.00 |
| 188 | <i>F. rusticolus</i> | Far East | CF_Chuk_N2_2019_Chukotka       | 8 / 4 | 0.01 | 0.01 | 0.99 | 0.00 | I | 0.99 | 0.00 | 0.00 | 0.01 |
| 189 | <i>F. rusticolus</i> | Far East | CF_Chuk_N3_2019_Chukotka       | 8 / 4 | 0.01 | 0.00 | 0.99 | 0.00 | I | 1.00 | 0.00 | 0.00 | 0.00 |
| 190 | <i>F. rusticolus</i> | Far East | CF_Chuk_N4_2019_Chukotka       | 8 / 4 | 0.01 | 0.00 | 0.98 | 0.01 | I | 0.98 | 0.00 | 0.00 | 0.02 |
| 191 | <i>F. rusticolus</i> | Far East | CF_Chuk_N5_2019_Chukotka       | 8 / 4 | 0.01 | 0.01 | 0.98 | 0.01 | I | 1.00 | 0.00 | 0.00 | 0.00 |
| 192 | <i>F. rusticolus</i> | Far East | ACF_Kamchatka-N1_2014_Far-East | 8 / 4 | 0.01 | 0.00 | 0.99 | 0.00 | I | 1.00 | 0.00 | 0.00 | 0.00 |
| 193 | <i>F. rusticolus</i> | Far East | ACF_Kamchatka-N2_2014_Far-East | 8 / 4 | 0.01 | 0.00 | 0.98 | 0.01 | I | 0.99 | 0.00 | 0.00 | 0.01 |
| 194 | <i>F. rusticolus</i> | Far East | ACF_Kamchatka-N3_2014_Far-East | 8 / 4 | 0.01 | 0.01 | 0.98 | 0.01 | I | 1.00 | 0.00 | 0.00 | 0.00 |
| 195 | <i>F. rusticolus</i> | Far East | ACF_Kamchatka-N4_2019_Far-East | 8 / 4 | 0.02 | 0.01 | 0.96 | 0.01 | I | 1.00 | 0.00 | 0.00 | 0.00 |
| 196 | <i>F. rusticolus</i> | Far East | ACF_Kamchatka-N5_2019_Far-East | 8 / 4 | 0.01 | 0.01 | 0.98 | 0.01 | I | 0.87 | 0.00 | 0.00 | 0.13 |
| 197 | <i>F. rusticolus</i> | Far East | ACF_Kamchatka-N6_2019_Far-East | 8 / 4 | 0.01 | 0.01 | 0.97 | 0.01 | I | 1.00 | 0.00 | 0.00 | 0.00 |
| 198 | <i>F. rusticolus</i> | Far East | ACF_Kamchatka-N7_2019_Far-East | 8 / 4 | 0.01 | 0.00 | 0.99 | 0.00 | I | 1.00 | 0.00 | 0.00 | 0.00 |

**Supplementary Table S8.** Summary of individual assignments from predefined populations (prior information) to DAPC clusters<sup>8</sup>. Predefined population (PP) labels represent: (1) *F. cherrug* from eastern Europe; (2) *F. cherrug* from Khakassia and Dauria, grouped to balance sampling; (3) *F. cherrug* from Tuva; (4) *F. rusticolus* from the Far East. Clusters I–IV were identified by DAPC. The "Assignment per PP" value indicates the proportion of individuals successfully reassigned to their original clusters using discriminant functions – a high or low value denotes a clear-cut or admixed cluster, respectively. n – number of individuals.

|                   | PP individuals: distribution by cluster, n (%) |                                                                             |                                |                                         | Core of cluster, i.e.<br>> 50% of individual<br>from predefined<br>populations |
|-------------------|------------------------------------------------|-----------------------------------------------------------------------------|--------------------------------|-----------------------------------------|--------------------------------------------------------------------------------|
|                   | (1) Eastern European<br><i>F. cherrug</i>      | (2) Khakassian (n = 25)<br>with Daurian (n = 3) <i>F.</i><br><i>cherrug</i> | (3) Tuvan<br><i>F. cherrug</i> | (4) Far Eastern<br><i>F. rusticolus</i> |                                                                                |
| PP size, n        | 15                                             | 28                                                                          | 125                            | 30                                      |                                                                                |
| Assignment per PP | 0.9642857                                      | 0.9666667                                                                   | 0.9482759                      | 0.9807692                               |                                                                                |
| I (n = 28)        | –                                              | 1 (3.6%)                                                                    | 2 (7.1%)                       | 25 (89.3%)                              | 83.3% of PP (4)                                                                |
| II (n = 60)       | 8 (13.3%)                                      | 17 (28.3%)                                                                  | 35 (58.3%)                     | –                                       | 53.3% of PP (1)<br>60.7% of PP (2)                                             |
| III (n = 58)      | 5 (8.6%)                                       | 5 (8.6%)                                                                    | 47 (81%)                       | 1 (1.7%)                                | –                                                                              |
| IV (n = 52)       | 2 (3.8%)                                       | 5 (9.6%)                                                                    | 41 (78.8%)                     | 4 (7.7%)                                | –                                                                              |

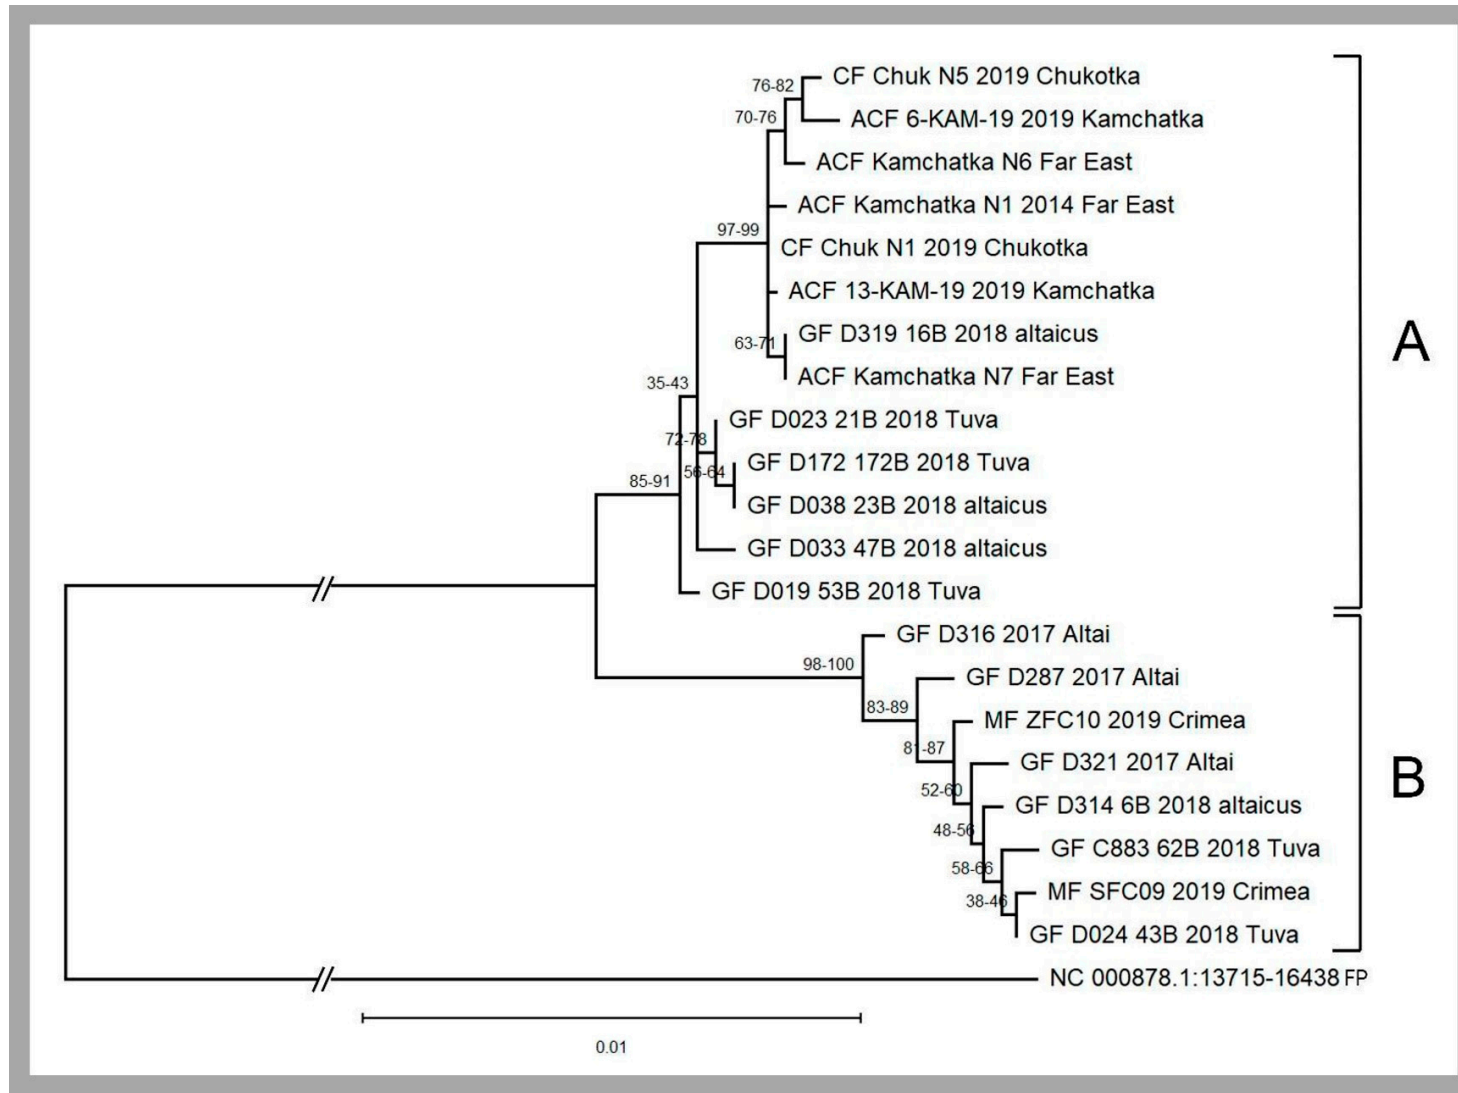

**Supplementary Figure S6.** Maximum Likelihood phylogenetic tree based on the original 21 mitochondrial DNA sequences. The tree was constructed using the HKY model of nucleotide substitution in MEGA12<sup>10</sup>, with *F. peregrinus* (NC\_000878.1: 13715–16438) included as an outgroup. Branch support values, shown as percentages, represent the proportion of replicate trees (161 replicates, determined adaptively) in which the associated taxa clustered together. Haplogroups A and B are marked by square brackets.

**Supplementary Table S9.** Summary of intrapopulation genetic diversity metrics<sup>11-13</sup> across ten microsatellite loci for the studied populations. Population labels represent: (1) *F. cherrug* from eastern Europe; (2) *F. cherrug* from Khakassia (n = 25) and Dauria (n = 3), grouped to balance sampling; (3) *F. cherrug* from Tuva; (4) *F. rusticolus* from the Far East. Genetic diversity indices are presented as total and mean  $\pm$  standard error (SE) values. N: number of individuals; Na: number of alleles; Ne: effective number of alleles; I: Shannon's information index; Ho: observed heterozygosity; He: expected heterozygosity; uHe: unbiased expected heterozygosity; F: fixation index; A': rarefaction-corrected<sup>14</sup> allelic richness (minimum sample size = 18 genes); A<sub>pr</sub>: rarefaction-corrected<sup>14</sup> private allelic richness. For each index, the minimum value is highlighted in red, and the maximum value is underlined.

| Population                                               | Metric | N              | Na            | Ne           | I            | Ho           | He           | uHe          | F            | A'          | A <sub>pr</sub> |
|----------------------------------------------------------|--------|----------------|---------------|--------------|--------------|--------------|--------------|--------------|--------------|-------------|-----------------|
| <b>(1) Eastern European<br/><i>F. cherrug</i></b>        | Total  | 15             | 84            |              |              |              |              |              |              | 5.55        | 1.26            |
|                                                          | Mean   | 13.800         | 8.400         | 6.095        | 1.814        | 0.732        | 0.778        | 0.808        | 0.057        |             |                 |
|                                                          | SE     | 0.629          | 1.166         | 1.040        | 0.177        | 0.055        | 0.043        | 0.045        | 0.053        |             |                 |
| <b>(2) Khakassian with<br/>Daurian <i>F. cherrug</i></b> | Total  | 28             | 113           |              |              |              |              |              |              | 5.73        | 1.35            |
|                                                          | Mean   | 27.600         | 12.100        | 7.000        | 2.017        | 0.745        | 0.798        | <u>0.813</u> | <u>0.059</u> |             |                 |
|                                                          | SE     | 0.221          | 1.952         | 1.287        | 0.198        | 0.040        | 0.042        | <u>0.042</u> | <u>0.037</u> |             |                 |
| <b>(3) Tuvan <i>F. cherrug</i></b>                       | Total  | 125            | 151           |              |              |              |              |              |              | <u>5.86</u> | <u>1.38</u>     |
|                                                          | Mean   | <u>123.700</u> | <u>15.300</u> | <u>8.837</u> | <u>2.152</u> | <u>0.804</u> | <u>0.806</u> | 0.809        | 0.002        |             |                 |
|                                                          | SE     | <u>0.716</u>   | <u>2.468</u>  | <u>1.651</u> | <u>0.240</u> | <u>0.056</u> | <u>0.056</u> | 0.056        | 0.018        |             |                 |
| <b>(4) Far Eastern <i>F.<br/>rusticolus</i></b>          | Total  | 30             | 82            |              |              |              |              |              |              | 4.55        | 0.85            |
|                                                          | Mean   | 29.800         | 8.200         | 5.086        | 1.597        | 0.699        | 0.716        | 0.729        | 0.033        |             |                 |
|                                                          | SE     | 0.133          | 1.611         | 1.018        | 0.216        | 0.069        | 0.057        | 0.057        | 0.046        |             |                 |

**Supplementary Table S10.** Results of the analysis of molecular variance (AMOVA) <sup>11-13</sup>. Values: df, degrees of freedom; SS, sum of squares; MS, mean square; Est. Var., estimated variance; %, percentage of variance.

| Source      | df  | SS       | MS     | Est. Var. | %    |
|-------------|-----|----------|--------|-----------|------|
| Among Pops  | 3   | 109.035  | 36.345 | 0.767     | 8%   |
| Within Pops | 194 | 1623.106 | 8.367  | 8.367     | 92%  |
| Total       | 197 | 1732.141 | -      | 9.133     | 100% |

**Supplementary Table S11.** Pairwise population differentiation ( $F_{ST}$ ) <sup>11-13</sup>. Population labels represent: (1) *F. cherrug* from eastern Europe; (2) *F. cherrug* from Khakassia (n = 25) and Dauria (n = 3), grouped to balance sampling; (3) *F. cherrug* from Tuva; (4) *F. rusticolus* from the Far East. The highest value in the matrix is highlighted in red.

| Species              | Population | <i>F. cherrug</i> |       |       | <i>F. rusticolus</i> |
|----------------------|------------|-------------------|-------|-------|----------------------|
|                      |            | (1)               | (2)   | (3)   | (4)                  |
|                      | (1)        | 0.000             |       |       |                      |
| <i>F. cherrug</i>    | (2)        | 0.024             | 0.000 |       |                      |
|                      | (3)        | 0.024             | 0.015 | 0.000 |                      |
| <i>F. rusticolus</i> | (4)        | 0.069             | 0.051 | 0.047 | 0.000                |

**Supplementary Table S12.** Summary statistics<sup>10, 15</sup> of genetic variability across 22 mitochondrial DNA sequences, covering the region from *cytb* to the control region (CR). CS: the complete fragment spanning *cytb*, tRNA-Thr, and CR. InDel: insertion-deletion mutations. FP: *F. peregrinus* mitogenome fragment (NC\_000878.1: 13715–16438). d/d': an average genetic distance within (d) and between (d') groups based on the Tamura-Nei distance model. SE: standard error, estimated with 1000 bootstrap replicates. V: variable sites. SVS: singleton variable sites. PIS: parsimony informative sites. Pi: nucleotide diversity. k: average number of nucleotide differences. h: number of haplotypes. Hd: haplotype diversity.

| Groups     |                                                            | Analyzed sequences (size of aligned fragments, bp) | d ± SE            | V (SVS/PIS) | Pi                   | k                  | h               | H <sub>d</sub>     |
|------------|------------------------------------------------------------|----------------------------------------------------|-------------------|-------------|----------------------|--------------------|-----------------|--------------------|
| Intragroup | Clade A (n = 13):                                          |                                                    |                   |             |                      |                    |                 |                    |
|            | <i>F. cherrug</i> (n = 6),<br><i>F. rusticolus</i> (n = 7) | CS with InDel (≤ 3005)                             | 0.00204 ± 0.00051 | 21 (9/12)   | 0.00182 <sup>a</sup> | 4.897 <sup>a</sup> | 10 <sup>a</sup> | 0.962 <sup>a</sup> |
|            |                                                            | <i>cytb</i> with tRNA-Thr (≤ 1214)                 | 0.00153 ± 0.00074 | 5 (1/4)     | 0.00152              | 1.846              | 5               | 0.808              |
|            |                                                            | CR with InDel (≤ 1791)                             | 0.00243 ± 0.00070 | 16 (8/8)    | 0.00206 <sup>b</sup> | 3.051 <sup>b</sup> | 9 <sup>b</sup>  | 0.910 <sup>b</sup> |
|            | Clade B (n = 8):                                           |                                                    |                   |             |                      |                    |                 |                    |
|            | <i>F. cherrug</i> (n = 8)                                  |                                                    |                   |             |                      |                    |                 |                    |
|            |                                                            | <i>cytb</i> with tRNA-Thr (≤ 1214)                 | 0.00136 ± 0.00069 | 4 (1/3)     | 0.00135              | 1.643              | 4               | 0.821              |

|                               |                 | CR with InDel ( $\leq 1684$ )             | 0.00255 $\pm$ 0.00073 | 14 (11/2) | 0.00261 <sup>d</sup> | 3.464 <sup>d</sup> | 7 <sup>d</sup> | 0.964 <sup>d</sup> |
|-------------------------------|-----------------|-------------------------------------------|-----------------------|-----------|----------------------|--------------------|----------------|--------------------|
| Groups                        |                 | Analyzed sequences                        | d' $\pm$ SE           |           |                      |                    |                |                    |
| Intergroup                    | Clade A/Clade B | CS with InDel ( $\leq 3005$ )             | 0.0108 $\pm$ 0.0018   |           |                      |                    |                |                    |
|                               |                 | <i>cytb</i> with tRNA-Thr ( $\leq 1214$ ) | 0.00726 $\pm$ 0.00225 |           |                      |                    |                |                    |
|                               |                 | CR with InDel ( $\leq 1791$ )             | 0.0137 $\pm$ 0.0028   |           |                      |                    |                |                    |
|                               | FP/Clade A      | CS with InDel ( $\leq 3014$ )             | 0.0409 $\pm$ 0.0040   |           |                      |                    |                |                    |
|                               |                 | <i>cytb</i> with tRNA-Thr (1214)          | 0.0408 $\pm$ 0.0060   |           |                      |                    |                |                    |
|                               |                 | CR with InDel ( $\leq 1800$ )             | 0.0412 $\pm$ 0.0055   |           |                      |                    |                |                    |
|                               | FP/Clade B      | CS with InDel ( $\leq 3014$ )             | 0.0453 $\pm$ 0.0042   |           |                      |                    |                |                    |
|                               |                 | <i>cytb</i> with tRNA-Thr (1214)          | 0.0449 $\pm$ 0.0063   |           |                      |                    |                |                    |
| CR with InDel ( $\leq 1800$ ) |                 | 0.0458 $\pm$ 0.0057                       |                       |           |                      |                    |                |                    |

|            |                                       |                                  |                     |
|------------|---------------------------------------|----------------------------------|---------------------|
| Intergroup | <i>F. rusticolus</i> (n = 7)/<br>FP   | CS with InDel ( $\leq 3014$ )    | $0.0413 \pm 0.0041$ |
|            |                                       | <i>cytb</i> with tRNA-Thr (1214) | $0.0406 \pm 0.0061$ |
|            |                                       | CR with InDel ( $\leq 1800$ )    | $0.0420 \pm 0.0055$ |
|            | <i>F. rusticolus</i> (n = 7)/Clade A* | CS with InDel ( $\leq 3014$ )    | $0.0029 \pm 0.0008$ |
|            |                                       | <i>cytb</i> with tRNA-Thr (1214) | 0                   |
|            |                                       | CR with InDel ( $\leq 1800$ )    | $0.0033 \pm 0.0011$ |
|            | <i>F. rusticolus</i> (n = 7)/Clade B  | CS with InDel ( $\leq 3014$ )    | $0.0114 \pm 0.0020$ |
|            |                                       | <i>cytb</i> with tRNA-Thr (1214) | $0.0057 \pm 0.0017$ |
|            |                                       | CR with InDel ( $\leq 1800$ )    | $0.0143 \pm 0.0029$ |

---

Lengths of the analyzed control region fragments excluding indels: <sup>a</sup> – 2695 bp, <sup>b</sup> – 1481 bp, <sup>c</sup> – 2539 bp, <sup>d</sup> –  $\leq 1325$  bp. \* – excluding sample GF\_D319\_16B\_2018\_altaicus\_AF due to its introgression or incomplete lineage sorting.

## References

1. Rozhkova, D.N.; Zinevich, L.S.; Karyakin, I.V.; Sorokin, A.G.; Tambovtseva, V.G.; Kulikov, A.M. Non-neutral cytochrome b variability in the saker Falco cherrug Grey, 1834 and gyrfalcon Falco rusticolus L. Russ. J. Genet. 2021, 57, 4, 468–476. DOI: 10.1134/S1022795421040128
2. Zinevich, L.; Prommer, M.; Laczkó, L.; Rozhkova, D.; Sorokin, A.; Karyakin, I.; Bagyura, J.; Cserkés, T.; Sramkó, G. Phylogenomic insights into the polyphyletic nature of Altai falcons within eastern sakers (Falco cherrug) and the origins of gyrfalcons (Falco rusticolus). Sci. Rep. 2023, 13, 1, 17800. DOI: 10.1038/s41598-023-44534-4
3. Horváth, M.B.; Martínez-Cruz, B.; Negro, J.J.; Kalmár, L.; Godoy, J.A. An overlooked DNA source for non-invasive genetic analysis in birds. J. Avian Biol. 2005, 36, 1, 84–88.
4. Drummond, A.J.; Rambaut, A. BEAST: Bayesian evolutionary analysis by sampling trees. BMC Evol. Biol. 2007, 7, 1–8. DOI: 10.1186/1471-2148-7-214
5. Puechmaile, S.J. The program structure does not reliably recover the correct population structure when sampling is uneven: subsampling and new estimators alleviate the problem. Mol. Ecol. Resour. 2016, 16, 608–627. DOI: 10.1111/1755-0998.12512
6. Li, Y.L.; Liu, J.X. StructureSelector: A web based software to select and visualize the optimal number of clusters using multiple methods. Mol. Ecol. Resour. 2018, 18, 176–177. DOI: 10.1111/1755-0998.12719
7. Guillot, G.; Mortier, F.; Estoup, A. Geneland: A computer package for landscape genetics. Mol. Ecol. Notes 2005, 5, 708–711. DOI: 10.1111/j.1471-8286.2005.01031
8. Jombart, T. adegenet: a R package for the multivariate analysis of genetic markers. Bioinformatics 2008, 24, 1403–1405. DOI:10.1093/bioinformatics/btn129
9. Pritchard, J.K.; Stephens, M.; Donnelly, P. Inference of population structure using multilocus genotype data. Genetics 2000, 155, 2, 945–59. DOI: 10.1093/genetics/155.2.945
10. Kumar, S.; Stecher, G.; Suleski, M.; Sanderford, M.; Sharma, S.; Tamura, K. MEGA12: Molecular Evolutionary Genetic Analysis version 12 for adaptive and green computing. Mol. Biol. Evol. 2024, 41, 12, msae263. DOI: 10.1093/molbev/msae263
11. Peakall, R.; Smouse, P.E. GENALEX 6: genetic analysis in Excel. Population genetic software for teaching and research. Mol. Ecol. Notes. 2006, 6, 288–295. DOI: 10.1111/j.1471-8286.2005.01155.x
12. Peakall, R.; Smouse, P.E. GenAlEx 6.5: genetic analysis in Excel. Population genetic software for teaching and research – an update. Bioinformatics 2012, 28, 2537–2539. DOI: 10.1093/bioinformatics/bts460
13. Smouse, P.E.; Banks, S.C.; Peakall, R. Converting quadratic entropy to diversity: Both animals and alleles are diverse, but some are more diverse than others. PLoS ONE 2017, 12, 10, e0185499. DOI: 10.1371/journal.pone.0185499
14. Kalinowski, S.T. HP-Rare: a computer program for performing rarefaction on measures of allelic diversity. Mol. Ecol. Notes 2005, 5, 187–189. DOI: 10.1111/j.1471-8286.2004.00845.x
15. Rozas, J.; Ferrer-Mata, A.; Sánchez-DelBarrio, J.C.; Guirao-Rico, S.; Librado, P.; Ramos-Onsins, S.E.; Sánchez-Gracia, A. DnaSP 6: DNA sequence polymorphism analysis of large data sets. Mol. Biol. Evol. 2017, 34, 12, 3299–3302. DOI:10.1093/molbev/msx248
